# Supplementary material for: 5-Ferrocenyl-2,2′-bipyridine ligands: synthesis, palladium(ii) and copper(i) complexes, optical and electrochemical properties
Source: Royal Society of Chemistry journal article supplement (doi:10.1039/c4ra05333h), 2014-01-01
Supplement: c4ra05333h1.pdf [file c4ra05333h1.pdf]

Supporting Information

5-Ferrocenyl-2,2'-bipyridine Ligands: synthesis,  
palladium(II) and copper(I) complexes, optical and  
electrochemical properties.

*Synøve Ø. Scottwell,<sup>a</sup> Karl J. Shaffer,<sup>a</sup> C. John McAdam,<sup>a</sup> and James D. Crowley<sup>a\*</sup>*

<sup>a</sup>Department of Chemistry, University of Otago, PO Box 56, Dunedin,

New Zealand; Fax: +64 3 479 7906; Tel: +64 3 479 7731.

**\*[jcrowley@chemistry.otago.ac.nz](mailto:jcrowley@chemistry.otago.ac.nz)**

## Contents

|       |                                                                                                                                       |    |
|-------|---------------------------------------------------------------------------------------------------------------------------------------|----|
| 1     | Experimental Procedures .....                                                                                                         | 3  |
| 1.1   | General .....                                                                                                                         | 3  |
| 1.2   | Ligand Synthesis.....                                                                                                                 | 4  |
| 1.2.1 | Synthesis of 5-bromo-2,2'-bipyridine ( <b>2a</b> ) .....                                                                              | 4  |
| 1.2.2 | Synthesis of 5-bromo-5'-methyl-2,2'-bipyridine ( <b>2b</b> ) .....                                                                    | 5  |
| 1.2.3 | Synthesis of 5-ferrocenyl-2,2'-bipyridine ( <b>3a</b> ) .....                                                                         | 6  |
| 1.2.4 | Synthesis of 5-ferrocenyl-5'-methyl-2,2'-bipyridine ( <b>3b</b> ) .....                                                               | 7  |
| 1.2.5 | Synthesis of 6,6'-dimesityl-2,2'-bipyridine ( <b>10</b> ) .....                                                                       | 8  |
| 1.3   | Palladium(II) Complexation .....                                                                                                      | 9  |
| 1.3.1 | Synthesis of [Pd(5-ferrocenyl-2,2'-bipyridine)Cl <sub>2</sub> ] ( <b>4a</b> ) .....                                                   | 9  |
| 1.3.2 | Synthesis of [Pd(5-ferrocenyl-5'-methyl-2,2'-bipyridine)Cl <sub>2</sub> ] ( <b>4b</b> ) .....                                         | 9  |
| 1.3.3 | Synthesis of [Pd(5-ferrocenyl-2,2'-bipyridine)(pyridine) <sub>2</sub> ](SbF <sub>6</sub> ) <sub>2</sub> ( <b>5a</b> ) .....           | 10 |
| 1.3.4 | Synthesis of [Pd(5-ferrocenyl-5'-methyl-2,2'-bipyridine)(pyridine) <sub>2</sub> ](SbF <sub>6</sub> ) <sub>2</sub> ( <b>5b</b> ) ..... | 11 |
| 1.3.5 | Synthesis of [Pd(5-ferrocenyl-2,2'-bipyridine)(DMAP) <sub>2</sub> ](SbF <sub>6</sub> ) <sub>2</sub> ( <b>6a</b> ) .....               | 12 |
| 1.3.6 | Synthesis of [Pd(5-ferrocenyl-5'-methyl-2,2'-bipyridine)(DMAP) <sub>2</sub> ](SbF <sub>6</sub> ) <sub>2</sub> ( <b>6b</b> ) .....     | 13 |
| 1.3.7 | Synthesis of [Pd(5-ferrocenyl-2,2'-bipyridine) <sub>2</sub> ](SbF <sub>6</sub> ) <sub>2</sub> ( <b>9a</b> ) .....                     | 14 |
| 1.4   | Copper(I) Complexation.....                                                                                                           | 15 |
| 1.4.1 | [Cu(6,6'-dimesityl-2,2'-bipyridine)(MeCN) <sub>2</sub> ]PF <sub>6</sub> ( <b>10Cu</b> ) .....                                         | 15 |
| 1.4.2 | [Cu(6,6'-dimesityl-2,2'-bipyridine)(5-ferrocenyl-2,2'-bipyridine)]PF <sub>6</sub> ( <b>11a</b> ) .....                                | 16 |
| 1.4.3 | [Cu(6,6'-dimesityl-2,2'-bipyridine)(5-ferrocenyl-5'-methyl-2,2'-bipyridine)]PF <sub>6</sub> ( <b>11b</b> ) .....                      | 17 |
| 2     | Pertinent <sup>1</sup> H NMR Stackplots .....                                                                                         | 18 |
| 3     | Representative Mass Spectra .....                                                                                                     | 21 |
| 4     | UV-Vis Spectra .....                                                                                                                  | 26 |
| 5     | Electrochemistry .....                                                                                                                | 28 |
| 5.1   | Representative Voltammograms .....                                                                                                    | 28 |
| 6     | X-ray Data .....                                                                                                                      | 30 |
| 6.1   | Crystallographic Data Tables .....                                                                                                    | 30 |
| 6.2   | Crystal Structures and Relevant Notes .....                                                                                           | 33 |
| 7     | References .....                                                                                                                      | 37 |

# 1 Experimental Procedures

## 1.1 General

Unless otherwise stated, all reagents were purchased from commercial sources and used without further purification. The solvents used were laboratory grade, with petrol referring to the fraction of petroleum ether boiling in the range 40-60 °C, and ether referring to diethyl ether. Dry tetrahydrofuran (THF), acetonitrile (CH<sub>3</sub>CN), dichloromethane (CH<sub>2</sub>Cl<sub>2</sub>) and chloroform (CHCl<sub>3</sub>) were obtained by passing them through an activated alumina column using a PureSolv™ solvent purification system (Innovative Technologies Inc., MA). Ammonium hydroxide/ethylenediaminetetraacetic acid (NH<sub>4</sub>OH/EDTA) solution was made up by dissolving 30 g EDTA with 900 mL water and 100 mL NH<sub>4</sub>OH. Microwave-assisted reactions were performed in a CEM Focused Microwave Synthesis System, Discover S-Class (CEM Corporation, NC), at 300 W.

<sup>1</sup>H and <sup>13</sup>C NMR spectra were recorded on either a 400 MHz Varian/Agilent 400-MR or Varian 500 MHz AR spectrometer at 298 K. Chemical shifts (δ) are reported in parts per million (ppm) and referenced to residual solvent peaks (CDCl<sub>3</sub>: <sup>1</sup>H δ 7.26 ppm, <sup>13</sup>C δ 77.16 ppm; *d*<sub>6</sub>-acetone: <sup>1</sup>H δ 2.05 ppm; <sup>13</sup>C δ 29.84 & 206.26 ppm; CD<sub>3</sub>CN: <sup>1</sup>H δ 1.94 ppm, <sup>13</sup>C δ 1.32 & 118.26 ppm). Coupling constants (*J*) are reported in Hertz (Hz). Standard abbreviations indicating multiplicity were used as follows: m = multiplet, q = quartet, t = triplet, dt = double triplet, d = doublet, dd = double doublet, s = singlet. IR spectra were recorded on a Bruker ALPHA FT-IR spectrometer with an attached ALPHA-P measurement module, and band intensities are reported as strong (s), medium (m), or weak (w). Microanalyses were conducted at the Campbell Microanalytical Laboratory at the University of Otago. Electrospray mass spectra (ESMS) were collected on a Bruker micrOTOF-Q spectrometer. Melting points were determined using a Leica VMHB melting bar. UV-visible absorption spectra were acquired with a Jasco V550 UV/VIS spectrophotometer.

## 1.2 Ligand Synthesis

### 1.2.1 Synthesis of 5-bromo-2,2'-bipyridine (2a)

The synthesis of this compound has previously been reported by Rieke in 72% yield.<sup>1</sup>

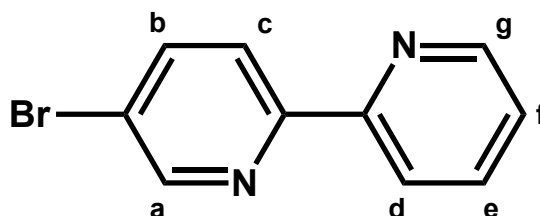

Under a nitrogen atmosphere, a solution of 2-pyridylzinc(II) bromide (THF, 0.5 M, 50 mL, 25.0 mmol, 1.10 eq.) was added to a solution of THF (20 mL) containing 2,5-dibromopyridine (5.38 g, 22.7 mmol, 1.00 eq.) and *tetrakis*(triphenylphosphine)palladium(0) (0.53 g, 0.46 mmol, 0.02 eq.). The resulting suspension was refluxed for five hours, before stirring at room temperature overnight (16 hours).  $\text{NH}_4\text{OH}/\text{EDTA}$  (200 mL) and  $\text{CH}_2\text{Cl}_2$  (150 mL) were added and the mixture allowed to stir for four hours. The organic phase was washed with water (2 × 50 mL) and saturated aqueous NaCl (2 × 50 mL), then dried over  $\text{Na}_2\text{SO}_4$  and excess solvent removed under reduced pressure. Column chromatography (silica gel, gradient 100% petrol, then 1:1 petrol / $\text{CH}_2\text{Cl}_2$ , then 95:5  $\text{CH}_2\text{Cl}_2$ /acetone) was used to obtain a colourless solid. The solid residue was dissolved in  $\text{CH}_3\text{CN}$  and vapour diffused diethyl ether to provide colourless crystals. Yield: 3.84 g, 72%. Mp 82 °C;  $^1\text{H}$  NMR (400 MHz,  $\text{CDCl}_3$ )  $\delta$  8.72 (dd,  $J = 2.4, 0.7$  Hz, 1H,  $\text{H}_a$ ), 8.67 (ddd,  $J = 4.8, 1.8, 0.9$  Hz, 1H,  $\text{H}_g$ ), 8.37 (dt,  $J = 8.0, 1.1$  Hz, 1H,  $\text{H}_c$ ), 8.32 (dd,  $J = 8.5, 0.7$  Hz, 1H,  $\text{H}_d$ ), 7.93 (dd,  $J = 8.5, 2.4$  Hz, 1H,  $\text{H}_b$ ), 7.81 (ddd,  $J = 8.1, 7.5, 1.8$  Hz, 1H,  $\text{H}_f$ ), 7.33 (ddd,  $J = 7.5, 4.8, 1.2$  Hz, 1H,  $\text{H}_e$ );  $^{13}\text{C}$  NMR (125 MHz,  $\text{CDCl}_3$ )  $\delta$  155.3, 154.8, 150.3, 149.4, 139.6, 137.2, 124.1, 122.5, 121.3, 121.1; IR (ATR):  $\nu$  ( $\text{cm}^{-1}$ ) 3089 (w), 1549 (m), 1431 (m), 1363 (m), 1001 (s), 786 (s), 733 (s), 631 (s); HRESI-MS (MeOH):  $m/z = 234.9870$  [ $\mathbf{2a}+\text{H}$ ]<sup>+</sup> (calc. for  $\text{C}_{10}\text{H}_7\text{BrN}_2\text{H}$  234.9865),  $m/z = 256.9684$  [ $\mathbf{2a}+\text{Na}$ ]<sup>+</sup> (calc. for  $\text{C}_{10}\text{H}_7\text{BrN}_2\text{Na}$  256.9685); Anal. Calc. for  $\text{C}_{10}\text{H}_7\text{BrN}_2$ : C, 51.09; H, 3.00; N, 11.92. Found: C, 51.09; H, 2.93; N, 11.65.

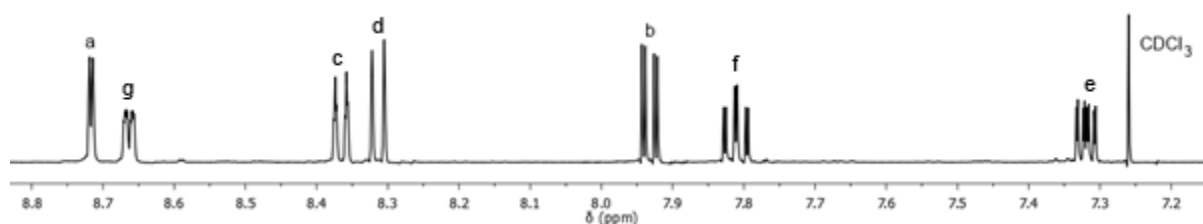

Figure S1  $^1\text{H}$  NMR spectrum (400 MHz,  $\text{CDCl}_3$ ) of **2a**.

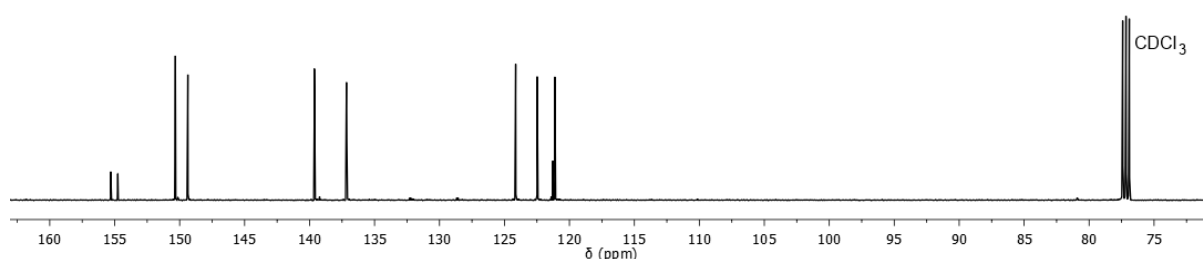

Figure S2  $^{13}\text{C}$  NMR spectrum (125 MHz,  $\text{CDCl}_3$ ) of **2a**.

### 1.2.2 Synthesis of 5-bromo-5'-methyl-2,2'-bipyridine (2b)

The synthesis of this compound has previously been reported by Rieke in 63% yield.<sup>1</sup>

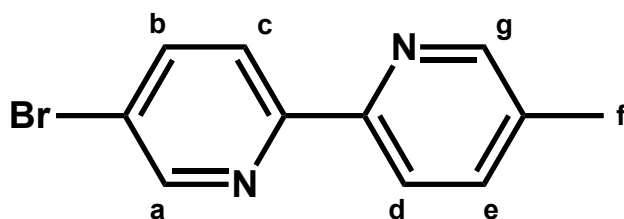

Under a nitrogen atmosphere, a solution of 5-methyl-2-pyridylzinc(II) bromide (THF, 0.5 M, 50 mL, 25.0 mmol, 1.20 eq.) was added to a solution of THF (20 mL) containing 2,5-dibromopyridine (5.00 g, 21.1 mmol, 1.00 eq.) and *tetrakis*(triphenylphosphine)palladium(0) (0.45 g, 0.39 mmol, 0.02 eq.). The resulting suspension was refluxed for five hours, before stirring at room temperature overnight (16 hours).  $\text{NH}_4\text{OH}$ /EDTA (200 mL) and  $\text{CH}_2\text{Cl}_2$  (150 mL) were added and the mixture allowed to stir for four hours. The organic phase was washed with water ( $2 \times 50$  mL) and saturated aqueous NaCl ( $2 \times 50$  mL), then dried over  $\text{MgSO}_4$  and excess solvent removed under reduced pressure. The crude product was slurried with ether, filtered and washed with additional ether. Column chromatography (silica gel, gradient 100%  $\text{CH}_2\text{Cl}_2$  to 9:1  $\text{CH}_2\text{Cl}_2$ /acetone) was used to obtain a colourless solid. The solid residue was dissolved in  $\text{CH}_3\text{CN}$  and vapour diffused diethyl ether to provide colourless crystals. Yield: 4.73 g, 90%. Mp 102 °C;  $^1\text{H}$  NMR (400 MHz,  $\text{CDCl}_3$ )  $\delta$  8.70 (dd,  $J = 2.4, 0.7$  Hz, 1H,  $\text{H}_a$ ), 8.49 (dd,  $J = 2.3, 0.7$  Hz, 1H,  $\text{H}_g$ ), 8.29 - 8.24 (m, 2H,  $\text{H}_{c/d}$ ), 7.92 (dd,  $J = 8.5, 2.4$  Hz, 1H,  $\text{H}_b$ ), 7.62 (ddq,  $J = 8.0, 2.2, 0.7$  Hz, 1H,  $\text{H}_e$ ), 2.39 (s, 3H,  $\text{H}_f$ );  $^{13}\text{C}$  NMR (125 MHz,  $\text{CDCl}_3$ )  $\delta$  154.9, 152.8, 150.1, 149.8, 139.5, 137.6, 133.9, 122.1, 120.8, 120.6, 18.5; IR (ATR):  $\nu$  ( $\text{cm}^{-1}$ ) 2918 (m), 1544 (m), 1456 (m), 1360 (m), 818 (s); HRESI-MS (MeOH):  $m/z = 270.9804$  [ $2b + \text{Na}$ ] $^+$  (calc. for  $\text{C}_{11}\text{H}_9\text{BrN}_2\text{Na}$  270.9841); Anal. Calc. for  $\text{C}_{11}\text{H}_9\text{BrN}_2$ : C, 53.04; H, 3.64; N, 11.25. Found: C, 53.11; H, 3.61; N, 11.22.

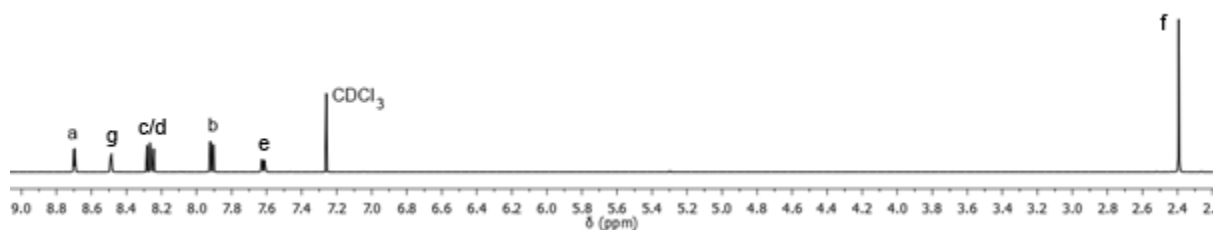

Figure S3  $^1\text{H}$  NMR spectrum (400 MHz,  $\text{CDCl}_3$ ) of **2b**.

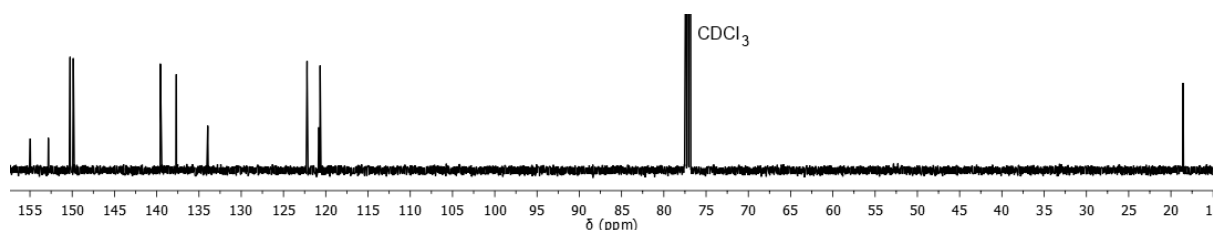

Figure S4  $^{13}\text{C}$  NMR spectrum (125 MHz,  $\text{CDCl}_3$ ) of **2b**.

### 1.2.3 Synthesis of 5-ferrocenyl-2,2'-bipyridine (3a)

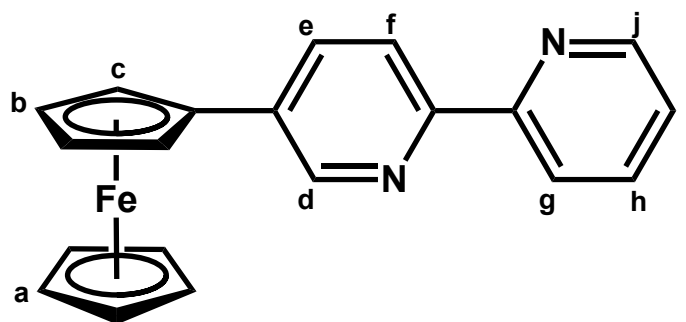

1,4-Dioxane (4.0 mL), 1,2-dimethoxyethane (4.0 mL), 1 M Na<sub>2</sub>CO<sub>3</sub> (3.0 mL, 3.00 mmol, 1.50 eq.) and 3 M NaOH (1.5 mL, 1.50 mmol, 0.75 eq.) were added to a 35 mL microwave vial equipped with a stirrer bar and degassed with N<sub>2</sub> for 10 minutes. Ferroceneboronic acid (0.454 g, 1.98 mmol, 1.00 eq.), 5-bromo-2,2'-bipyridine (0.464 g, 1.98 mmol, 1.00 eq.) and [PdCl<sub>2</sub>(1,1'-bis(diphenylphosphino)ferrocene)] (0.081 g, 0.10 mmol, 0.05 eq.) were added to the vial which was sealed then flushed with N<sub>2</sub>. The vial was shaken to ensure homogeneity then heated via microwave irradiation for 30 minutes at 110 °C (300 W). The reaction mixture was added to aqueous NH<sub>4</sub>Cl (200 mL) and CH<sub>2</sub>Cl<sub>2</sub> (200 mL) and after a second extraction with CH<sub>2</sub>Cl<sub>2</sub> (200 mL), the combined organic layers were filtered and dried over Na<sub>2</sub>SO<sub>4</sub>. The solvent was removed *in vacuo* and the product purified by column chromatography (silica gel, gradient 100:0 to 99:1 to 98:2 CH<sub>2</sub>Cl<sub>2</sub>/acetone). The product was isolated as an orange solid (0.419 g, 62%). Mp 142 °C; <sup>1</sup>H NMR (400 MHz, CDCl<sub>3</sub>) δ 8.81 (s, 1H, H<sub>d</sub>), 8.69 (d, *J* = 5.5 Hz, 1H, H<sub>j</sub>), 8.40 (d, *J* = 8.0 Hz, 1H, H<sub>f</sub>), 8.33 (d, *J* = 8.3 Hz, 1H, H<sub>g</sub>), 7.87 (dd, *J* = 8.2, 2.3 Hz, 1H, H<sub>e</sub>), 7.82 (t, *J* = 7.6 Hz, 1H, H<sub>i</sub>), 7.32 – 7.29 (m, 1H, H<sub>h</sub>), 4.75 (s, 2H, H<sub>c</sub>), 4.42 (s, 2H, H<sub>b</sub>), 4.08 (s, 5H, H<sub>a</sub>); <sup>13</sup>C NMR (125 MHz, CDCl<sub>3</sub>) δ 156.3, 153.6, 149.3, 146.8, 137.0, 136.0, 133.9, 123.5, 120.8, 120.8, 81.41, 69.9, 69.8, 66.7; IR (ATR): ν (cm<sup>-1</sup>) 1571 (m), 1462 (m), 1431 (s), 1376 (m), 1105 (m), 889 (s), 815 (s), 799 (s), 751 (s), 508 (s), 491 (s), 460 (s); HRESI-MS (MeOH) *m/z* = 341.0722 [**3a**+H]<sup>+</sup> (calc. for C<sub>20</sub>H<sub>16</sub>FeN<sub>2</sub>H 341.0736). UV-Vis (acetone) λ<sub>max</sub> (ε/ L mol<sup>-1</sup> cm<sup>-1</sup>): 369 (4000), 456 (1400); Anal. Calc. for C<sub>20</sub>H<sub>16</sub>FeN<sub>2</sub>: C, 70.61; H, 4.74; N, 8.23. Found: C, 70.57; H, 4.84; N, 8.40.

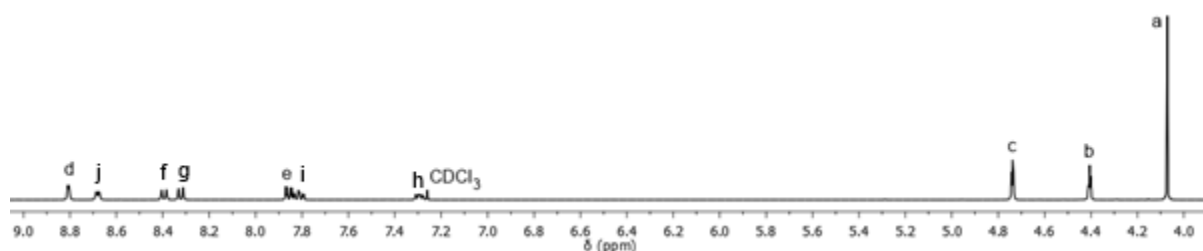

Figure S5 <sup>1</sup>H NMR spectrum (400 MHz, CDCl<sub>3</sub>) of **3a**.

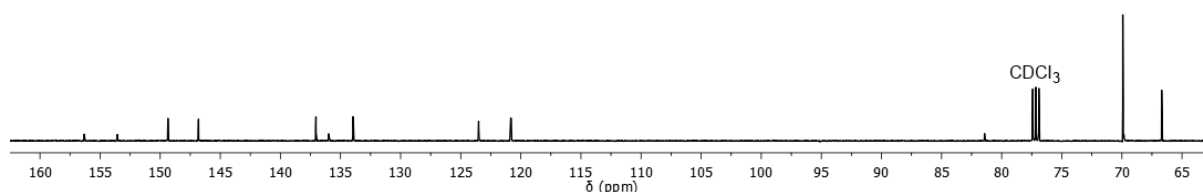

Figure S6 <sup>13</sup>C NMR spectrum (125 MHz, CDCl<sub>3</sub>) of **3a**.

### 1.2.4 Synthesis of 5-ferrocenyl-5'-methyl-2,2'-bipyridine (**3b**)

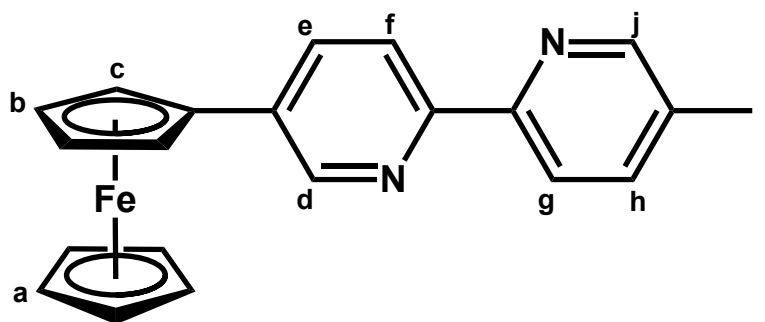

1,4-Dioxane (4.0 mL), 1,2-dimethoxyethane (4.0 mL), 1 M Na<sub>2</sub>CO<sub>3</sub> (3.0 mL, 3.00 mmol, 1.81 eq.) and 3 M NaOH (1.5 mL, 1.50 mmol, 0.91 eq.) were added to a 35 mL microwave vial equipped with a stirrer bar and degassed with N<sub>2</sub> for 10 minutes. Ferroceneboronic acid (0.380 g, 1.65 mmol, 1.00 eq.), 5-bromo-5'-methyl-2,2'-bipyridine (0.412 g, 1.65 mmol, 1.00 eq.) and [PdCl<sub>2</sub>(1,1'-bis(diphenylphosphino)ferrocene)] (0.068 g, 0.08 mmol, 0.05 eq.) were added to the vial which was sealed then flushed with N<sub>2</sub>. The vial was shaken to ensure homogeneity then heated via microwave irradiation for 30 minutes at 110 °C (300 W). The reaction mixture was added to aqueous NH<sub>4</sub>Cl (200 mL) and CH<sub>2</sub>Cl<sub>2</sub> (200 mL) and after a second extraction with CH<sub>2</sub>Cl<sub>2</sub> (200 mL) the combined organic layers were filtered and dried over Na<sub>2</sub>SO<sub>4</sub>. The solvent was removed *in vacuo* and the product purified by column chromatography (silica gel, gradient 100:0 to 99:1 to 98:2 CH<sub>2</sub>Cl<sub>2</sub>/acetone). The product was isolated as an orange solid (0.426 g, 73%). Mp 165 °C; <sup>1</sup>H NMR (400 MHz, CDCl<sub>3</sub>) δ 8.79 (s, 1H, H<sub>d</sub>), 8.51 (s, 1H, H<sub>j</sub>), 8.28 (d, *J* = 8.2 Hz, 2H, H<sub>f/g</sub>), 7.85 (dd, *J* = 8.2, 2.2 Hz, 1H, H<sub>e</sub>), 7.63 (d, *J* = 8.2 Hz, 1H, H<sub>h</sub>), 4.73 (t, *J* = 1.7 Hz, 2H, H<sub>c</sub>), 4.40 (t, *J* = 1.7 Hz, 2H, H<sub>b</sub>), 4.08 (s, 5H, H<sub>a</sub>), 2.40 (s, 3H, H<sub>i</sub>); <sup>13</sup>C NMR (125 MHz, CDCl<sub>3</sub>) δ 153.8, 153.7, 149.8, 146.7, 137.6, 135.5, 134.0, 133.2, 120.5, 120.4, 81.6, 69.9, 69.8, 66.7, 18.5; IR (ATR): ν (cm<sup>-1</sup>) 1573 (w), 1475 (m), 1374 (m), 1103 (m), 1090 (m), 1027 (m), 886 (m), 825 (s), 739 (m), 649 (m), 510 (s), 492 (s); HRESI-MS (MeOH): *m/z* = 355.0871 [**3b**+H]<sup>+</sup> (calc. for C<sub>21</sub>H<sub>18</sub>FeN<sub>2</sub>H 355.0892); UV-Vis (acetone) λ<sub>max</sub> (ε/ L mol<sup>-1</sup> cm<sup>-1</sup>): 364 (4100), 450 (1200); Anal. Calc. for C<sub>21</sub>H<sub>18</sub>FeN<sub>2</sub>: C, 71.20; H, 5.12; N, 7.91. Found: C, 70.81; H, 5.14; N, 7.99.

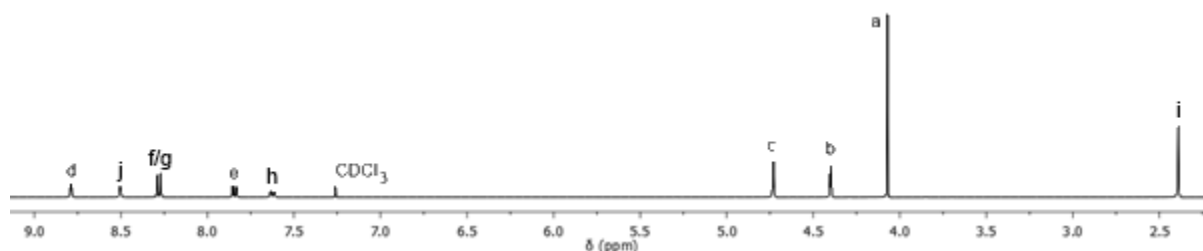

Figure S7 <sup>1</sup>H NMR spectrum (400 MHz, CDCl<sub>3</sub>) of **3b**.

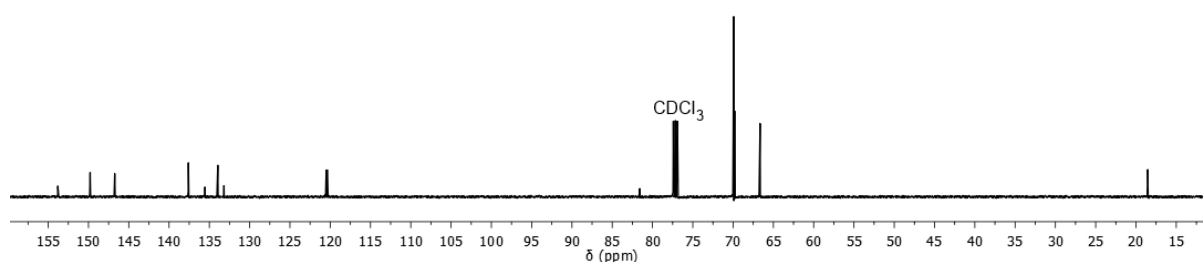

Figure S8 <sup>13</sup>C NMR spectrum (125 MHz, CDCl<sub>3</sub>) of **3b**.

### 1.2.5 Synthesis of 6,6'-dimesityl-2,2'-bipyridine (10)

The synthesis of this compound has previously been reported by Schmittl in 72% yield.<sup>2</sup>

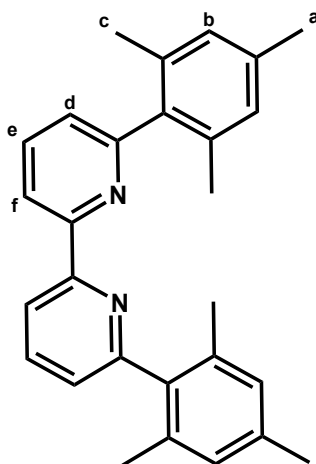

Under a nitrogen atmosphere, 6,6'-dibromo-2,2'-bipyridine (0.20 g, 0.64 mmol, 1.00 eq.) and *tetrakis*(triphenylphosphine)palladium(0) (0.006 g, 5.2  $\mu$ mol, 0.008 eq.) were dissolved in degassed boiling toluene. A solution of mesitylboronic acid (0.25 g, 1.52 mmol, 2.40 eq.) in methanol (5 mL) and 2 M  $\text{Na}_2\text{CO}_3$  (8 mL, 16.0 mmol, 25.1 eq.) were added, and the mixture refluxed for four hours. An additional 0.1 g of mesitylboronic acid was then added, and heating was continued for a further three days. After cooling, the solvent layers were separated, and the organic layer washed with a saturated aqueous solution of  $\text{Na}_2\text{CO}_3$  containing a small amount of ammonia. The aqueous layer was extracted with  $\text{CH}_2\text{Cl}_2$  (2 x 50 mL), which in turn was washed with the  $\text{Na}_2\text{CO}_3$  solution. The organic layers were combined, dried over  $\text{Na}_2\text{SO}_4$  and the solvent removed *in vacuo*. Column chromatography (silica,  $\text{CH}_2\text{Cl}_2$ ) was used to isolate the white product (0.199 g, 80%). Mp 211  $^\circ\text{C}$ ;  $^1\text{H}$  NMR (400 MHz,  $\text{CDCl}_3$ )  $\delta$  8.38 (d,  $J = 7.9$  Hz, 2H,  $\text{H}_f$ ), 7.80 (t,  $J = 7.8$  Hz, 2H,  $\text{H}_e$ ), 7.21 (d,  $J = 7.6$  Hz, 2H,  $\text{H}_d$ ), 6.98 (s, 4H,  $\text{H}_b$ ), 2.35 (s, 6H,  $\text{H}_a$ ), 2.12 (s, 12H,  $\text{H}_c$ );  $^{13}\text{C}$  NMR (125 MHz,  $\text{CDCl}_3$ )  $\delta$  159.2, 156.4, 138.2, 137.6, 137.0, 136.1, 128.6, 124.8, 119.3, 21.3, 20.6; IR:  $\nu$  ( $\text{cm}^{-1}$ ) 2915 (w), 1561 (s), 1438 (s), 851 (s), 815 (s), 631 (s); HRESI-MS (MeOH):  $m/z = 393.2329$  [ $\mathbf{10}+\text{H}$ ] $^+$  (calc. for  $\text{C}_{28}\text{H}_{28}\text{N}_2\text{H}$  393.23),  $m/z = 415.2158$  [ $\mathbf{10}+\text{Na}$ ] $^+$  (calc. for  $\text{C}_{28}\text{H}_{28}\text{N}_2\text{Na}$  415.53); Anal. Calc. for  $\text{C}_{28}\text{H}_{28}\text{N}_2$ : C, 85.67; H, 7.19; N, 7.14. Found: C, 85.43; H, 7.28; N, 7.28.

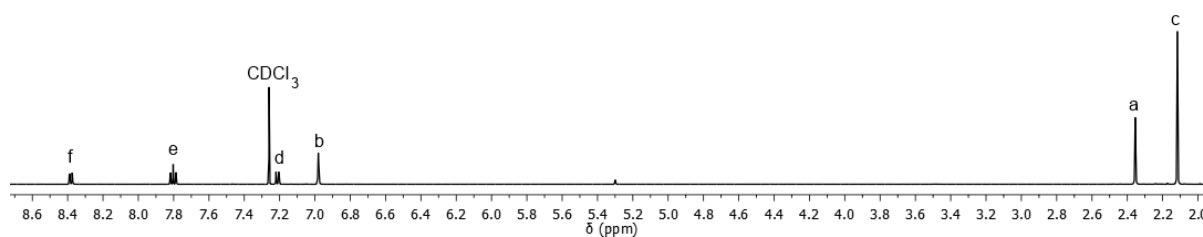

Figure S9  $^1\text{H}$  NMR spectrum (400 MHz,  $\text{CDCl}_3$ ) of **10**.

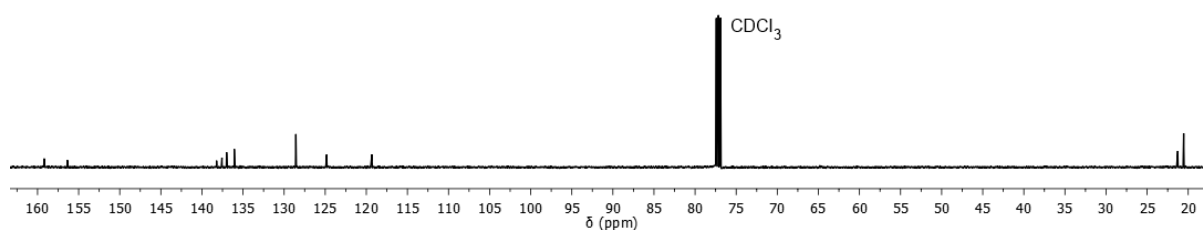



Figure S10  $^{13}\text{C}$  NMR spectrum (125 MHz,  $\text{CDCl}_3$ ) of **10**.

### 1.3 Palladium(II) Complexation

#### 1.3.1 Synthesis of $[\text{Pd}(\text{5-ferrocenyl-2,2'-bipyridine})\text{Cl}_2]$ (**4a**)

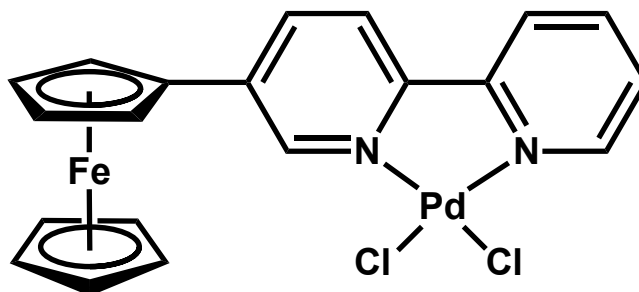

$[\text{Pd}(\text{MeCN})_2\text{Cl}_2]$  (15 mg, 0.059 mmol, 1.00 eq.) was added to a solution of **3a** (20 mg, 0.059 mmol, 1.00 eq.) in acetone (10 mL) and stirred for 30 minutes at room temperature, briefly sonicating during this time. The insoluble product precipitated and after addition of petroleum ether (10 mL) was isolated by filtration to give an orange solid (29 mg, 97%). Mp  $>230$  °C; IR:  $\nu$  ( $\text{cm}^{-1}$ ) 3098 (w), 1603 (m), 1480 (m), 1439 (m), 1174 (s), 841 (s), 811 (s), 779 (s), 740 (s), 717 (s); Anal. Calc. for  $\text{C}_{20}\text{H}_{16}\text{Cl}_2\text{FeN}_2\text{Pd}$ : C, 46.42; H, 3.12; N, 5.41. Found: C, 46.67; H, 3.23; N, 5.40.

#### 1.3.2 Synthesis of $[\text{Pd}(\text{5-ferrocenyl-5'-methyl-2,2'-bipyridine})\text{Cl}_2]$ (**4b**)

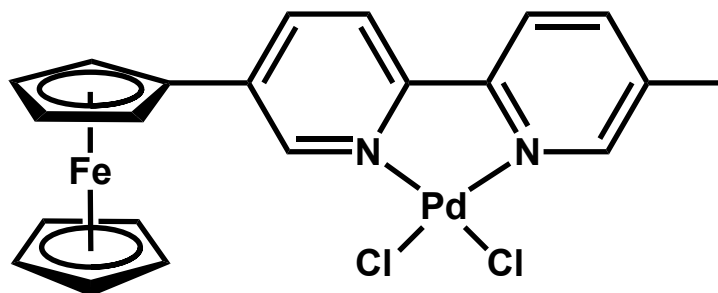

$[\text{Pd}(\text{MeCN})_2\text{Cl}_2]$  (15 mg, 0.028 mmol, 1.00 eq.) in acetone (2 mL) was layered over a solution of  $\text{CH}_2\text{Cl}_2$  (2 mL) containing **3b** (20 mg, 0.028 mmol, 1.00 eq.) and allowed to slowly diffuse together. The insoluble product formed as X-ray quality orange crystals (27 mg, 90%). Mp  $>230$  °C; IR:  $\nu$  ( $\text{cm}^{-1}$ ) 3076 (w), 1604 (w), 1489 (m), 1408 (m), 1377 (m), 1160 (m), 827 (s), 803 (s), 714 (m), 494 (s); Anal. Calc. for  $\text{C}_{21}\text{H}_{18}\text{Cl}_2\text{FeN}_2\text{Pd}$ : C, 47.45; H, 3.41; N, 5.27. Found: C, 47.50; H, 3.35; N, 5.27.

### 1.3.3 Synthesis of [Pd(5-ferrocenyl-2,2'-bipyridine)(pyridine)<sub>2</sub>](SbF<sub>6</sub>)<sub>2</sub> (5a)

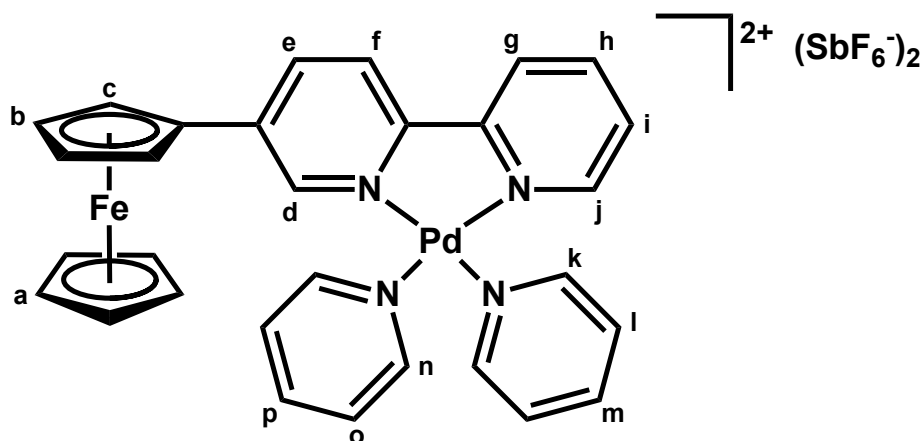

A solution of pyridine (24  $\mu$ L, 0.294 mmol, 2.00 eq.) in acetone (5 mL) was added to a suspension of [Pd(MeCN)<sub>2</sub>Cl<sub>2</sub>] (38 mg, 0.147 mmol, 1.00 eq.) in acetone (5 mL) and stirred for 30 minutes. AgSbF<sub>6</sub> (101 mg, 0.294 mmol, 2.00 eq.) in acetone (5 mL) was added and the solution was stirred for a further 30 minutes before the AgCl precipitate was removed via filtration. **3a** (50 mg, 0.147 mmol, 1.00 eq.) in acetone (5 mL) was added and the solution was stirred for 30 minutes. The crude product was obtained by precipitation upon addition of diethyl ether then purified by re-crystallisation from acetone via vapour diffusion of diethyl ether. Finally, after physical separation from a [Pd(pyridine)<sub>4</sub>](SbF<sub>6</sub>)<sub>2</sub> impurity  $\sim$ 5 mg, the product was isolated as purple needles (99 mg, 63%). Mp >230  $^{\circ}$ C; <sup>1</sup>H NMR (400 MHz, *d*<sub>6</sub>-acetone)  $\delta$  9.57 (d, *J* = 5.5 Hz, 2H, H<sub>k</sub>), 9.45 (d, *J* = 5.5 Hz, 2H, H<sub>n</sub>), 8.68 (d, *J* = 8.1 Hz, 1H, H<sub>j</sub>), 8.56 (s, 1H, H<sub>o</sub>), 8.58 – 8.50 (m, 2H, H<sub>f/g</sub>), 8.48 (t, *J* = 7.8 Hz, 1H, H<sub>m</sub>), 8.34 (t, *J* = 7.8 Hz, 1H, H<sub>p</sub>), 8.08 (t, *J* = 7.5 Hz, 2H, H<sub>l</sub>), 7.94 (t, *J* = 7.6 Hz, 2H, H<sub>o</sub>), 7.76 – 7.70 (m, 2H, H<sub>h/i</sub>), 7.36 (s, 1H, H<sub>e</sub>), 4.64 (s, 2H, H<sub>c</sub>), 4.56 (s, 2H, H<sub>b</sub>), 4.06 (s, 5H, H<sub>a</sub>); <sup>13</sup>C NMR (125 MHz, *d*<sub>6</sub>-acetone)  $\delta$  157.6, 152.8, 152.6, 151.2, 146.9, 144.1, 143.8, 143.2, 142.8, 138.9, 129.6, 129.5, 128.7, 128.6, 125.3, 124.9, 78.1, 72.6, 71.1, 68.1; IR:  $\nu$  (cm<sup>-1</sup>) 1594 (w), 1476 (m), 1454 (m), 1290 (w), 1247 (w), 1074 (w), 1020 (w), 788 (m), 762 (m), 698 (m), 653 (s); HRESI-MS (MeOH/acetone) *m/z* = 761.9091 [**5a**-Pyr-SbF<sub>6</sub>]<sup>+</sup> (calc. for C<sub>25</sub>H<sub>21</sub>F<sub>6</sub>FeN<sub>3</sub>PdSb 761.9071), *m/z* = 559.9831 [**5a**+Cl-Pyr-2SbF<sub>6</sub>]<sup>+</sup> (calc. for C<sub>25</sub>H<sub>21</sub>ClFeN<sub>3</sub>Pd 559.9813); UV-Vis (acetone)  $\lambda_{\text{max}}$  ( $\epsilon$ / L mol<sup>-1</sup> cm<sup>-1</sup>): 348 (31100), 550 (5200); Anal. Calc. for C<sub>30</sub>H<sub>26</sub>FeN<sub>4</sub>PdSb<sub>2</sub>F<sub>12</sub>: C, 33.48; H, 2.43; N, 5.21. Found: C, 3.83; H, 2.48; N, 5.14.

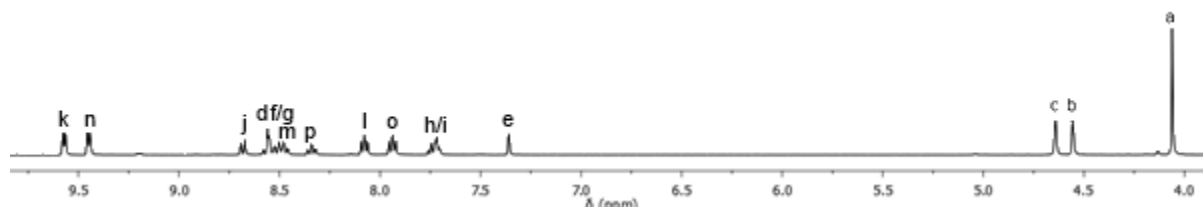

Figure S11 <sup>1</sup>H NMR spectrum (400 MHz, *d*<sub>6</sub>-acetone) of **5a**.

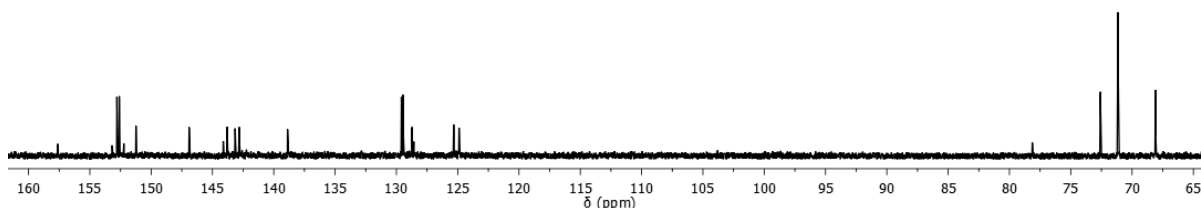

Figure S12  $^{13}\text{C}$  NMR spectrum (125 MHz,  $d_6$ -acetone) of **5a**.

### 1.3.4 Synthesis of $[\text{Pd}(\text{5-ferrocenyl-5'-methyl-2,2'-bipyridine})(\text{pyridine})_2](\text{SbF}_6)_2$ (**5b**)

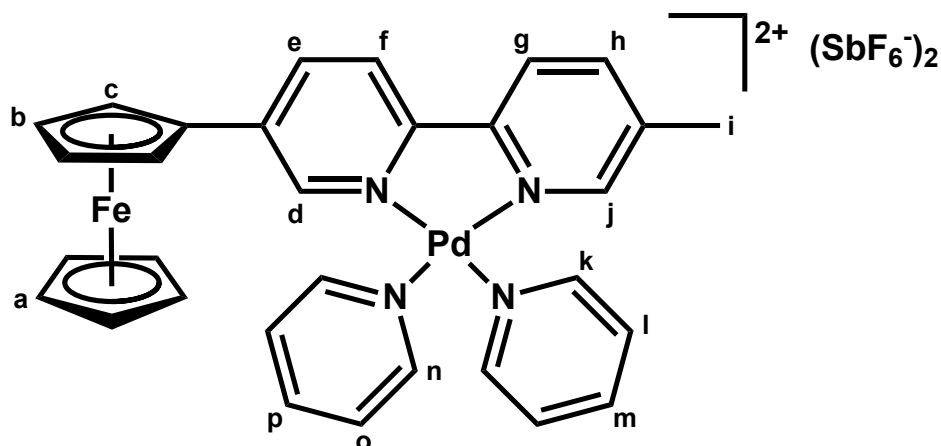

A solution of pyridine (23  $\mu\text{L}$ , 0.282 mmol, 2.00 eq.) in acetone (5 mL) was added to a suspension of  $[\text{Pd}(\text{MeCN})_2\text{Cl}_2]$  (37 mg, 0.141 mmol, 1.00 eq.) in acetone (5 mL) and stirred for 30 minutes.  $\text{AgSbF}_6$  (97 mg, 0.282 mmol, 2.00 eq.) in acetone (5 mL) was added and the solution was stirred for a further 30 minutes before the  $\text{AgCl}$  precipitate was removed via filtration. **3b** (50 mg, 0.141 mmol, 1.00 eq.) in acetone (5 mL) was added and the solution was stirred for 30 minutes. The crude product was obtained by precipitation upon addition of diethyl ether then purified by re-crystallisation from acetone via vapour diffusion of diethyl ether. Finally, after physical separation from a  $[\text{Pd}(\text{pyridine})_4](\text{SbF}_6)_2$  impurity  $\sim 5$  mg, the product was isolated as purple needles (111 mg, 70%). Mp  $>230$   $^\circ\text{C}$ ;  $^1\text{H}$  NMR (400 MHz,  $d_6$ -acetone)  $\delta$  9.57 (d,  $J = 6.3$  Hz, 2H,  $\text{H}_k$ ), 9.43 (d,  $J = 6.3$  Hz, 2H,  $\text{H}_n$ ), 8.58 (d,  $J = 8.2$  Hz, 2H,  $\text{H}_{f/g}$ ), 8.52 (s, 1H,  $\text{H}_d$ ), 8.48 (t,  $J = 7.8$  Hz, 1H,  $\text{H}_m$ ), 8.35 (s, 1H,  $\text{H}_j$ ), 8.33 (t,  $J = 7.7$  Hz, 1H,  $\text{H}_p$ ), 8.07 (t,  $J = 7.6$  Hz, 2H,  $\text{H}_l$ ), 7.92 (t,  $J = 7.6$  Hz, 2H,  $\text{H}_o$ ), 7.55 (s, 1H,  $\text{H}_h$ ), 7.32 (s, 1H,  $\text{H}_e$ ), 4.62 (s, 2H,  $\text{H}_c$ ), 4.54 (s, 2H,  $\text{H}_b$ ), 4.05 (s, 5H,  $\text{H}_a$ ), 2.33 (s, 3H,  $\text{H}_i$ );  $^{13}\text{C}$  NMR (125 MHz,  $d_6$ -acetone)  $\delta$  155.1, 152.9, 152.7, 151.0, 146.8, 144.2, 143.6, 143.2, 142.9, 140.3, 139.0, 129.7, 129.5, 129.5, 125.0, 124.4, 72.5, 71.2, 71.10, 68.1, 18.7; IR:  $\nu$  ( $\text{cm}^{-1}$ ) 1606 (w), 1486 (m), 1454 (m), 1291 (w), 1247 (w), 841 (m), 762 (m), 694 (m), 653 (s); HRESI-MS (MeOH/acetone)  $m/z = 775.9209$  [**5b**-Pyr- $\text{SbF}_6$ ] $^+$  (calc. for  $\text{C}_{26}\text{H}_{23}\text{F}_6\text{FeN}_3\text{PdSb}$  775.9228),  $m/z = 573.9945$  [**5b**+Cl-Pyr-2 $\text{SbF}_6$ ] $^+$  (calc. for  $\text{C}_{26}\text{H}_{23}\text{ClFeN}_3\text{Pd}$  573.9973); UV-Vis (acetone)  $\lambda_{\text{max}}$  ( $\epsilon/\text{L mol}^{-1}\text{ cm}^{-1}$ ): 349 (34900), 547 (5200); Anal. Calc. for  $\text{C}_{31}\text{H}_{28}\text{FeN}_4\text{PdSb}_2\text{F}_{12}$ : C, 34.15; H, 2.59; N, 5.14. Found: C, 34.40; H, 2.69; N, 5.00.

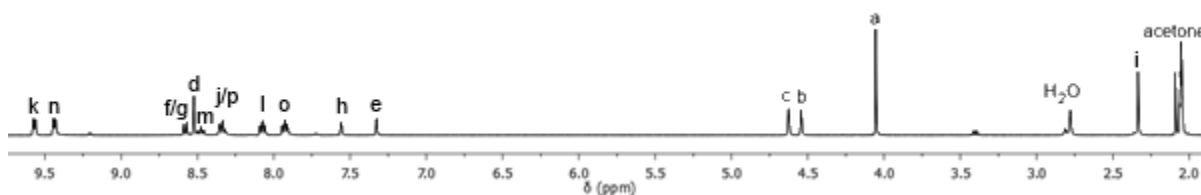

Figure S13  $^1\text{H}$  NMR spectrum (400 MHz,  $d_6$ -acetone) of **5b**.

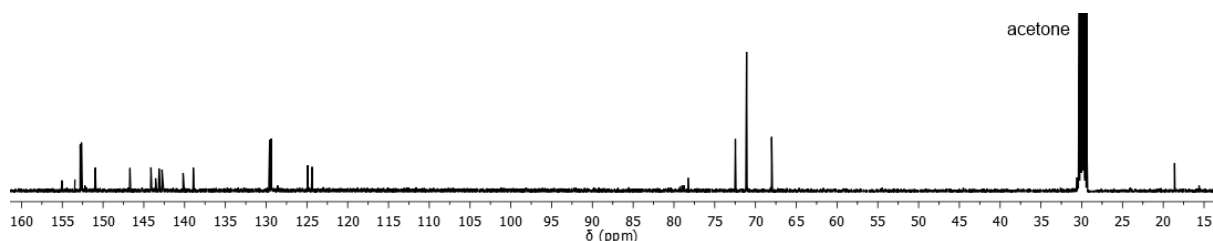

Figure S14  $^{13}\text{C}$  NMR spectrum (125 MHz,  $d_6$ -acetone) of **5b**.

### 1.3.5 Synthesis of $[\text{Pd}(\text{5-ferrocenyl-2,2'}$ -bipyridine) $(\text{DMAP})_2](\text{SbF}_6)_2$ (**6a**)

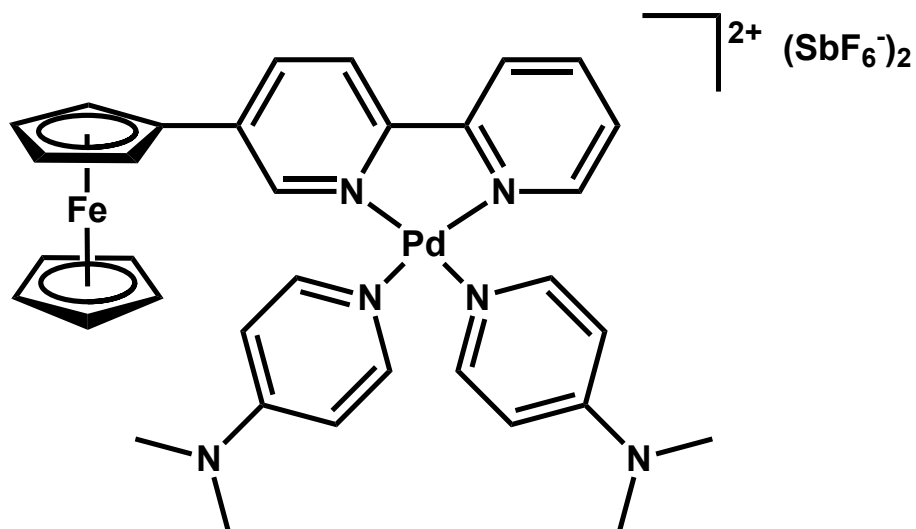

A solution of DMAP (14 mg, 0.118 mmol, 2.00 eq.) in acetone (5 mL) was added to a suspension of  $[\text{Pd}(\text{MeCN})_2\text{Cl}_2]$  (15 mg, 0.059 mmol, 1.00 eq.) in acetone (5 mL) and stirred for 30 minutes.  $\text{AgSbF}_6$  (40 mg, 0.118 mmol, 2.0 equiv.) in acetone (5 mL) was added and the solution was stirred for a further 30 minutes before the  $\text{AgCl}$  precipitate was removed via filtration. **3a** (20 mg, 0.059 mmol, 1.0 equiv.) in acetone (5 mL) was added and the solution was stirred for 30 minutes. The crude product was obtained by precipitation upon addition of petroleum ether then purified by re-crystallisation from acetone via vapour diffusion of diethyl ether. Finally, after physical separation from a  $[\text{Pd}(\text{DMAP})_4](\text{SbF}_6)_2$  impurity  $\sim 5$  mg, the product was isolated as purple blocks (48 mg, 71%). Mp  $>230$  °C; IR:  $\nu$  ( $\text{cm}^{-1}$ ) 1619 (m), 1547 (m), 1475 (m), 1441 (m), 1394 (m), 1223 (m), 1077 (m), 1026 (m), 818 (m), 786 (m), 652 (s); HRESI-MS (MeOH/acetone)  $m/z = 927.0359$  [**6a**- $\text{SbF}_6$ ] $^+$  (calc. for  $\text{C}_{34}\text{H}_{36}\text{F}_6\text{FeN}_6\text{PdSb}$  927.0327); Anal. Calc. for  $\text{C}_{34}\text{H}_{36}\text{FeN}_6\text{PdSb}_2\text{F}_{12}$ : C, 35.13; H, 3.12; N, 7.23. Found: C, 35.24; H, 3.26; N, 7.84.

### 1.3.6 Synthesis of [Pd(5-ferrocenyl-5'-methyl-2,2'-bipyridine)(DMAP)<sub>2</sub>](SbF<sub>6</sub>)<sub>2</sub> (**6b**)

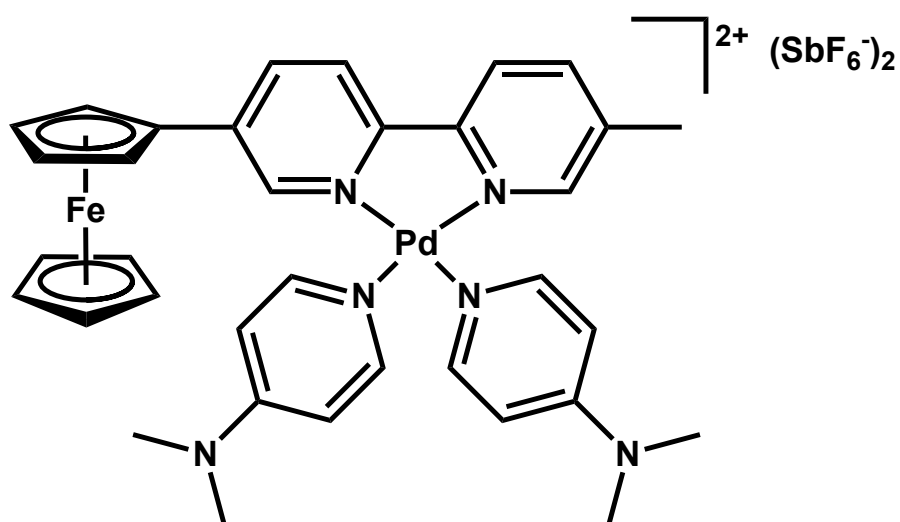

A solution DMAP (14 mg, 0.113 mmol, 2.00 eq.) in acetone (5 mL) was added to a suspension of [Pd(MeCN)<sub>2</sub>Cl<sub>2</sub>] (15 mg, 0.056 mmol, 1.00 eq.) in acetone (5 mL) and stirred for 30 minutes. AgSbF<sub>6</sub> (40 mg, 0.113 mmol, 2.00 eq.) in acetone (5 mL) was added and the solution was stirred for a further 30 minutes before the AgCl precipitate was removed via filtration. **3b** (20 mg, 0.056 mmol, 1.00 eq.) in acetone (5 mL) was added and the solution was stirred for 30 minutes. The crude product was obtained by precipitation upon addition of petroleum ether then purified by re-crystallisation from acetone via vapour diffusion of diethyl ether. Finally, after physical separation from a [Pd(DMAP)<sub>4</sub>](SbF<sub>6</sub>)<sub>2</sub> impurity ~5 mg, the product was isolated as purple needles (51 mg, 77%). Mp >230 °C; IR:  $\nu$  (cm<sup>-1</sup>) 1618 (m), 1549 (m), 1485 (m), 1443 (m), 1394 (m), 1221 (m), 1073 (m), 1025 (m), 815 (m), 652 (s); HRESI-MS (MeOH/acetone)  $m/z$  = 617.0312 [**6b**+Cl-DMAP-2SbF<sub>6</sub>]<sup>+</sup> (calc. for C<sub>28</sub>H<sub>28</sub>ClFeN<sub>4</sub>Pd 617.0392); Anal. Calc. for C<sub>35</sub>H<sub>38</sub>F<sub>12</sub>FeN<sub>6</sub>PdSb<sub>2</sub>: C, 35.73; H, 3.26; N, 7.14. Found: C, 35.92; H, 3.33; N, 7.41.



### 1.3.7 Synthesis of [Pd(5-ferrocenyl-2,2'-bipyridine)]<sub>2</sub>(SbF<sub>6</sub>)<sub>2</sub> (9a)

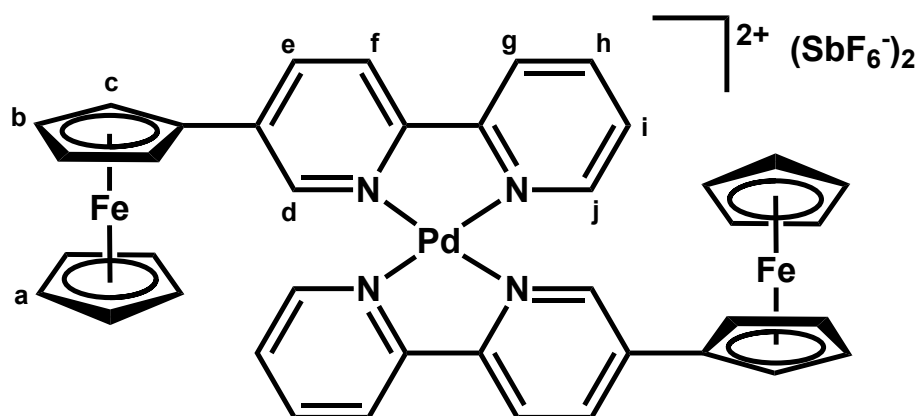

**3a** (20 mg, 0.059 mmol, 2.00 eq.), [Pd(MeCN)<sub>2</sub>Cl<sub>2</sub>] (6 mg, 0.029 mmol, 1.00 eq.) and AgSbF<sub>6</sub> (20 mg, 0.059 mmol, 2.00 eq.) were combined in acetone (5 mL) and the resulting solution stirred for 30 minutes. The AgCl precipitate was removed via filtration before the purple product was recovered via precipitation upon addition of ether (34 mg, 92%). Mp >230 °C; <sup>1</sup>H NMR (500 MHz, *d*<sub>6</sub>-acetone) δ 9.03-8.99 (m, 1H, H<sub>j</sub>), 8.96 (s, 1H, H<sub>d</sub>), 8.73-8.69 (m, 1H, H<sub>f</sub>), 8.68-8.63 (m, 1H, H<sub>e</sub>), 8.62-8.59 (m, 1H, H<sub>g</sub>), 8.55-8.49 (m, 1H, H<sub>h</sub>), 8.03-7.98 (m, 1H, H<sub>i</sub>), 5.10 (s, 2H, H<sub>c</sub>), 4.64 (s, 2H, H<sub>b</sub>), 4.18 (s, 5H, H<sub>a</sub>); <sup>13</sup>C NMR (125 MHz, *d*<sub>6</sub>-acetone) δ 160.5, 155.9, 153.3, 152.1, 148.1, 143.1, 138.6, 128.3, 124.9, 124.6, 78.9, 72.4, 71.2, 68.3; IR: ν (cm<sup>-1</sup>) 1603 (w), 1440 (w), 787 (m), 655 (s); HRESI-MS (MeOH) *m/z* = 1022.9277 [**9a**-SbF<sub>6</sub>]<sup>+</sup> (calc. for C<sub>40</sub>H<sub>32</sub>F<sub>6</sub>Fe<sub>2</sub>N<sub>4</sub>PdSb 1022.9316), *m/z* = 445.9719 [**9a**-FcBipy-2SbF<sub>6</sub>]<sup>+</sup> (calc. for C<sub>20</sub>H<sub>16</sub>FeN<sub>2</sub>Pd 445.9703); UV-Vis (acetone) λ<sub>max</sub> (ε/ L mol<sup>-1</sup> cm<sup>-1</sup>): 333 (35700), 542 (6000); Anal. Calc. for C<sub>40</sub>H<sub>32</sub>Fe<sub>2</sub>N<sub>4</sub>PdSb<sub>2</sub>F<sub>12</sub>: C, 38.18; H, 2.56; N, 4.45. Found: C, 39.94; H, 2.20; N, 4.49.

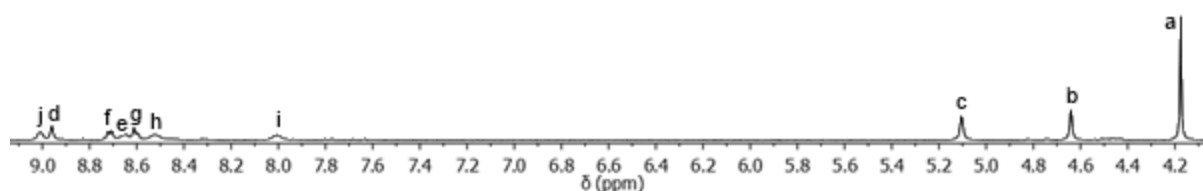

Figure S15 <sup>1</sup>H NMR spectrum (500 MHz, *d*<sub>6</sub>-acetone) of **9a**.

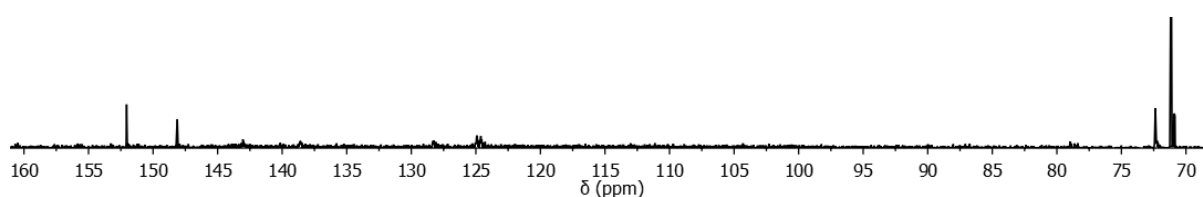

Figure S16 <sup>13</sup>C NMR spectrum (125 MHz, *d*<sub>6</sub>-acetone) of **9a**.

## 1.4 Copper(I) Complexation

### 1.4.1 [Cu(6,6'-dimesityl-2,2'-bipyridine)(MeCN)<sub>2</sub>](PF<sub>6</sub>) (10Cu)

The synthesis of this compound has previously been reported by Schmittl in quantitative yield.<sup>2</sup>

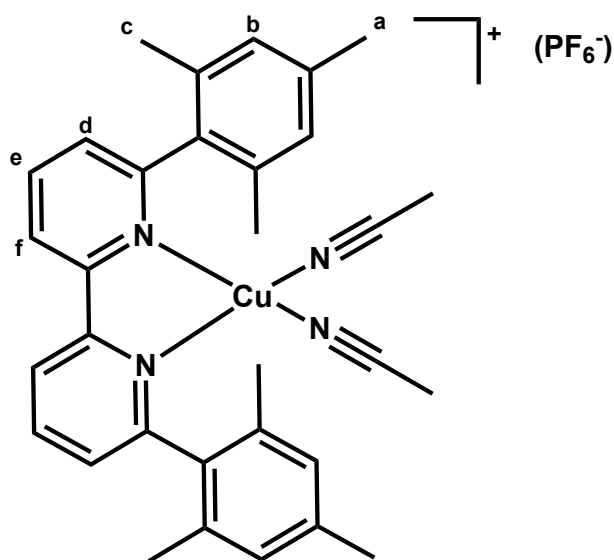

To a solution of [Cu(MeCN)<sub>4</sub>](PF<sub>6</sub>) (24 mg, 0.064 mmol, 1.00 eq.) in CD<sub>3</sub>CN (0.75 mL) was added a solution of **7** (25 mg, 0.064 mmol, 1.00 eq.) in CD<sub>3</sub>CN (0.75 mL). The mixture was stirred for 15 minutes, the resulting yellow solution subjected to <sup>1</sup>H NMR spectroscopy and mass spectrometry, and the complex was found to form in quantitative yield. <sup>1</sup>H NMR (400 MHz, CD<sub>3</sub>CN) δ 8.34 (d, *J* = 8.1 Hz, 2H, H<sub>f</sub>), 8.15 (t, *J* = 7.8 Hz, 2H, H<sub>e</sub>), 7.52 (d, *J* = 7.6 Hz, 2H, H<sub>d</sub>), 6.94 (s, 4H, H<sub>b</sub>), 2.28 (s, 6H, H<sub>a</sub>), 1.91 (s, 12H, H<sub>c</sub>). HRESI-MS (MeOH): *m/z* = 496.1739 [**10Cu**-MeCN-PF<sub>6</sub>]<sup>+</sup> (calc. for C<sub>30</sub>H<sub>31</sub>CuN<sub>3</sub> 496.1809), *m/z* = 473.1610 [**10Cu**-2MeCN-PF<sub>6</sub>+H<sub>2</sub>O]<sup>+</sup> (calc. for C<sub>28</sub>H<sub>30</sub>OCuN<sub>2</sub> 473.1649), *m/z* = 455.1491 [**10Cu**-MeCN-PF<sub>6</sub>]<sup>+</sup> (calc. for C<sub>28</sub>H<sub>28</sub>CuN<sub>2</sub> 455.1543).

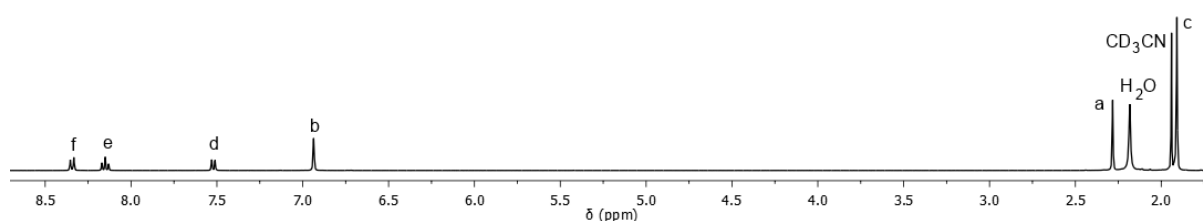

Figure S17 <sup>1</sup>H NMR spectrum (400 MHz, CD<sub>3</sub>CN) of **10Cu**.



### 1.4.2 [Cu(6,6'-dimesityl-2,2'-bipyridine)(5-ferrocenyl-2,2'-bipyridine)]PF<sub>6</sub> (**11a**)

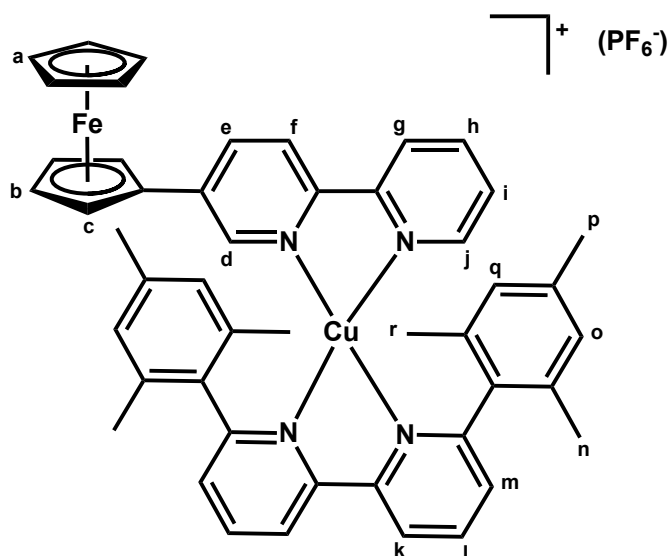

[Cu(MeCN)<sub>4</sub>]PF<sub>6</sub> (22 mg, 0.059 mmol, 1.00 eq.) was dissolved in acetone (3 mL) and **10** (23 mg, 0.059 mmol, 1.00 eq.), also dissolved in acetone (3 mL), was added. The mixture was stirred for 15 minutes to give a yellow solution. **3a** (20 mg, 0.059 mmol, 1.00 eq.) was dissolved in acetone (3 mL) and added to this solution. The mixture was stirred for a further 15 minutes, then filtered through a cotton wool plug and vapour diffused (acetone/petrol) in order to obtain dark orange crystals (45 mg, 82%). Mp >230 °C; <sup>1</sup>H NMR (400 MHz, CDCl<sub>3</sub>) 8.49 (d, *J* = 8.1 Hz, 2H, H<sub>k</sub>), 8.23 (t, *J* = 7.8 Hz, 2H, H<sub>l</sub>), 8.06 (s, 1H, H<sub>d</sub>), 8.05 (d, *J* = 7.9 Hz, 1H, H<sub>j</sub>), 7.98 (dd, *J* = 8.5, 1.9 Hz, 1H, H<sub>e</sub>), 7.93 – 7.76 (m, 3H, H<sub>f/g/h</sub>), 7.48 (d, *J* = 7.5 Hz, 2H, H<sub>m</sub>), 7.33 (t, *J* = 6.0 Hz, 1H, H<sub>i</sub>), 6.13 (s, 2H, H<sub>q</sub> or H<sub>o</sub>), 6.12 (s, 2H, H<sub>q</sub> or H<sub>o</sub>), 4.69 (s, 2H, H<sub>c</sub>), 4.47 (s, 2H, H<sub>b</sub>), 4.10 (s, 5H, H<sub>a</sub>), 1.85 (s, 6H, H<sub>p</sub>), 1.75 (s, 6H, H<sub>r</sub> or H<sub>n</sub>), 1.71 (s, 6H, H<sub>r</sub> or H<sub>n</sub>); <sup>13</sup>C NMR (125 MHz, *d*<sub>6</sub>-acetone) δ 159.3, 153.3, 152.2, 149.3, 149.1, 145.9, 139.5, 139.4, 138.5, 138.1, 138.0, 135.6, 135.5, 134.5, 128.1, 128.0, 127.9, 125.8, 121.3, 121.1, 121.0, 80.5, 71.2, 10.6, 67.5, 20.8, 20.6, 20.4; IR: ν (cm<sup>-1</sup>) 2917 (w), 1592 (m), 1559 (m), 829 (s), 555 (s); HRESI-MS (MeOH): *m/z* = 795.2176 [**11a**-PF<sub>6</sub>]<sup>+</sup> (calc. for C<sub>48</sub>H<sub>44</sub>CuFeN<sub>4</sub> 795.2208); UV-Vis (acetone) λ<sub>max</sub> (ε/ L mol<sup>-1</sup> cm<sup>-1</sup>): 327 (29800), 394 (4900), 479 (7500); Anal. Calc. for C<sub>48</sub>H<sub>44</sub>CuFeN<sub>4</sub>PF<sub>6</sub>: C, 61.25; H, 4.71; N, 5.95. Found: C, 61.07; H, 4.70; N, 5.88.

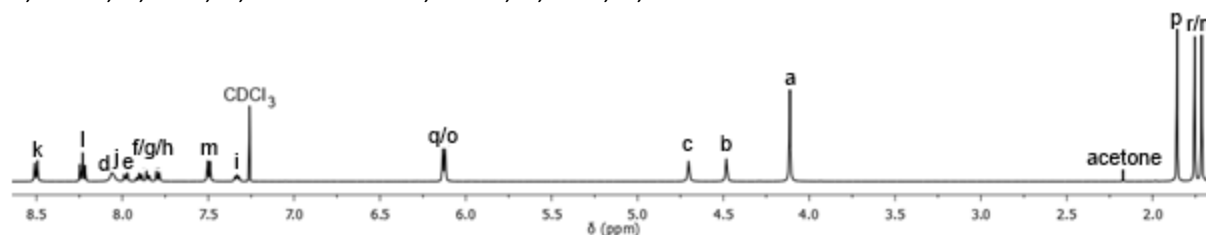

Figure S18 <sup>1</sup>H NMR spectrum (400 MHz, CDCl<sub>3</sub>) of **11a**.

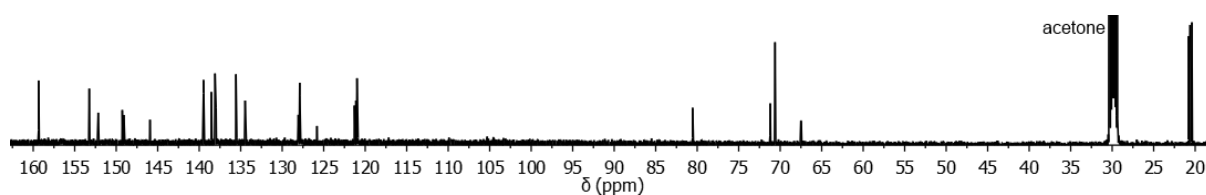

Figure S19 <sup>13</sup>C NMR spectrum (125 MHz, *d*<sub>6</sub>-acetone) of **11a**.

### 1.4.3 [Cu(6,6'-dimesityl-2,2'-bipyridine)(5-ferrocenyl-5'-methyl-2,2'-bipyridine)]PF<sub>6</sub> (**11b**)

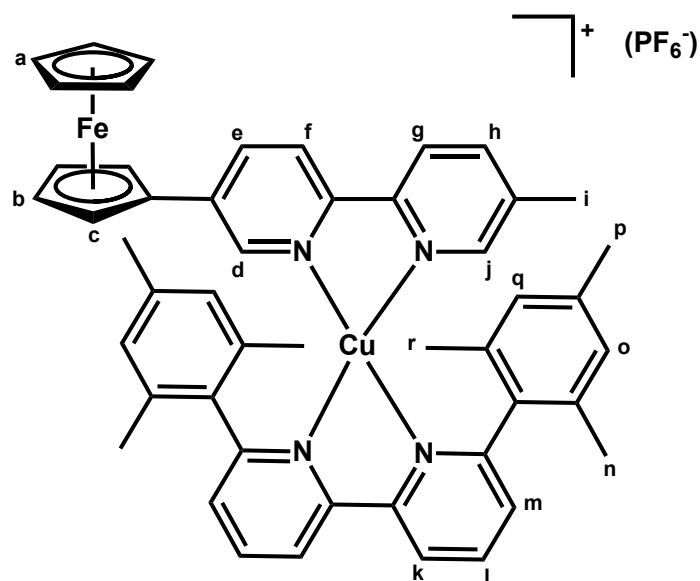

[Cu(MeCN)<sub>4</sub>]PF<sub>6</sub> (21 mg, 0.056 mmol, 1.00 eq.) was dissolved in acetone (3 mL) and **10** (22 mg, 0.056 mmol, 1.00 eq.), also dissolved in acetone (3 mL), was added. The mixture was stirred for 15 minutes to give a yellow solution. **3b** (20 mg, 0.056 mmol, 1.00 eq.) was dissolved in acetone (3 mL) and added to this solution. The mixture was stirred for 15 minutes, then filtered through a cotton wool plug and vapour diffused (acetone/petrol) in order to obtain dark orange crystals (44 mg, 82%). Mp >230 °C; <sup>1</sup>H NMR (400 MHz, CDCl<sub>3</sub>) δ 8.51 (d, *J* = 7.8 Hz, 2H, H<sub>k</sub>), 8.23 (t, *J* = 7.8 Hz, 2H, H<sub>l</sub>), 8.05 (s, 1H, H<sub>d</sub>), 7.94 (d, *J* = 7.8 Hz, 1H, H<sub>e</sub>), 7.88 (s, 1H, H<sub>i</sub>), 7.76 – 7.67 (m, 3H, H<sub>f/g/h</sub>), 7.50 (d, *J* = 7.2 Hz, 2H, H<sub>m</sub>), 6.13 (s, 4H, H<sub>q/o</sub>), 4.70 (s, 2H, H<sub>c</sub>), 4.48 (s, 2H, H<sub>b</sub>), 4.11 (s, 5H, H<sub>a</sub>), 2.36 (s, 3H, H<sub>i</sub>), 1.86 (s, 6H, H<sub>p</sub>), 1.77 (s, 6H, H<sub>r</sub> or H<sub>n</sub>), 1.72 (s, 6H, H<sub>r</sub> or H<sub>n</sub>); <sup>13</sup>C NMR (125 MHz, *d*<sub>6</sub>-acetone) δ 159.3, 153.2, 149.8, 149.4, 149.3, 145.8, 139.4, 138.9, 138.5, 138.2, 138.1, 136.0, 135.6, 135.5, 134.4, 128.0, 127.9, 127.9, 121.0, 120.9, 120.7, 80.7, 71.1, 70.6, 67.4, 20.8, 20.6, 20.3, 18.1; IR: ν (cm<sup>-1</sup>) 2921 (w), 1482 (m), 1408 (m), 834 (s), 759 (m), 731 (m); HRESI-MS (MeOH): *m/z* = 809.2398 [**11b**-PF<sub>6</sub>]<sup>+</sup> (calc. for C<sub>49</sub>H<sub>46</sub>CuFeN<sub>4</sub> 809.2364); UV-Vis (acetone) λ<sub>max</sub> (ε/ L mol<sup>-1</sup> cm<sup>-1</sup>): 329 (25200), 394 (5700), 473 (8600); Anal. Calc. for C<sub>49</sub>H<sub>46</sub>CuFeN<sub>4</sub>PF<sub>6</sub>: C, 61.61; H, 4.85; N, 5.66. Found: C, 61.61; H, 5.04; N, 5.68.

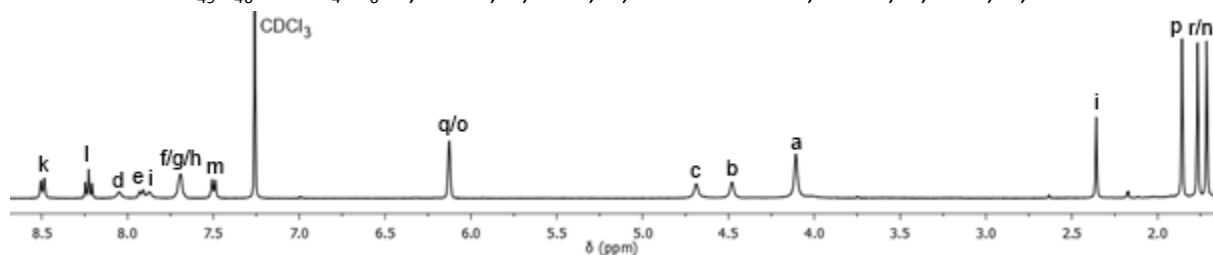

Figure S20 <sup>1</sup>H NMR spectrum (400 MHz, CDCl<sub>3</sub>) of **11b**.

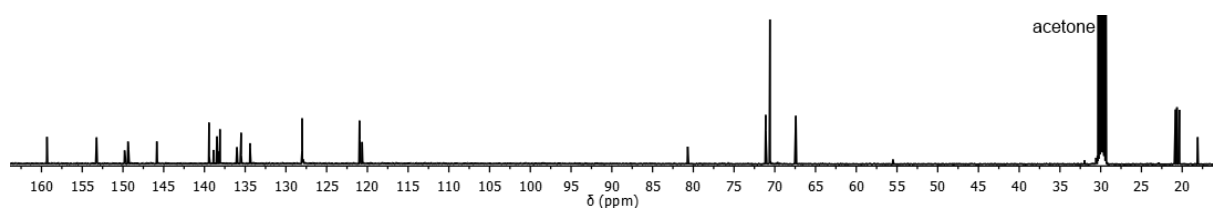

Figure S21 <sup>13</sup>C NMR spectrum (125 MHz, *d*<sub>6</sub>-acetone) of **11b**.

## 2 Pertinent $^1\text{H}$ NMR Stackplots

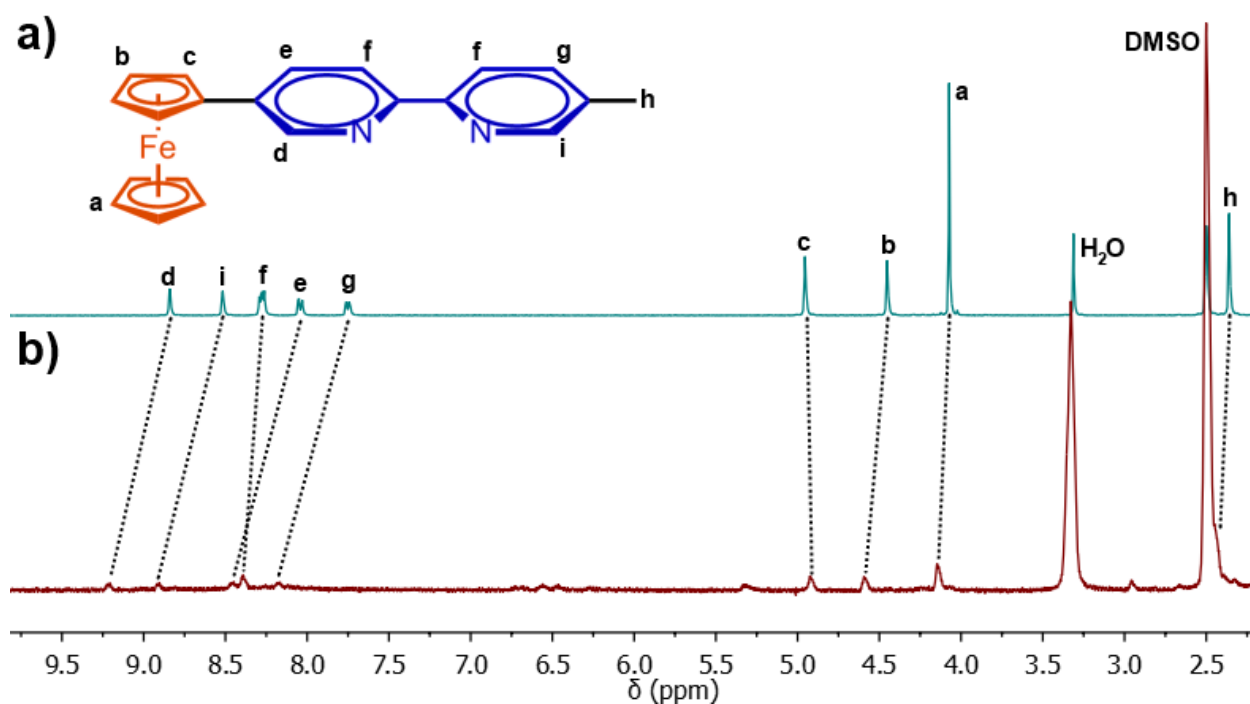

Figure S22 Stacked  $^1\text{H}$  NMR spectra ( $d_6$ -DMSO, 298 K) of a) the free ligand **3b** and b) the  $\text{PdCl}_2$  complex **4b**.

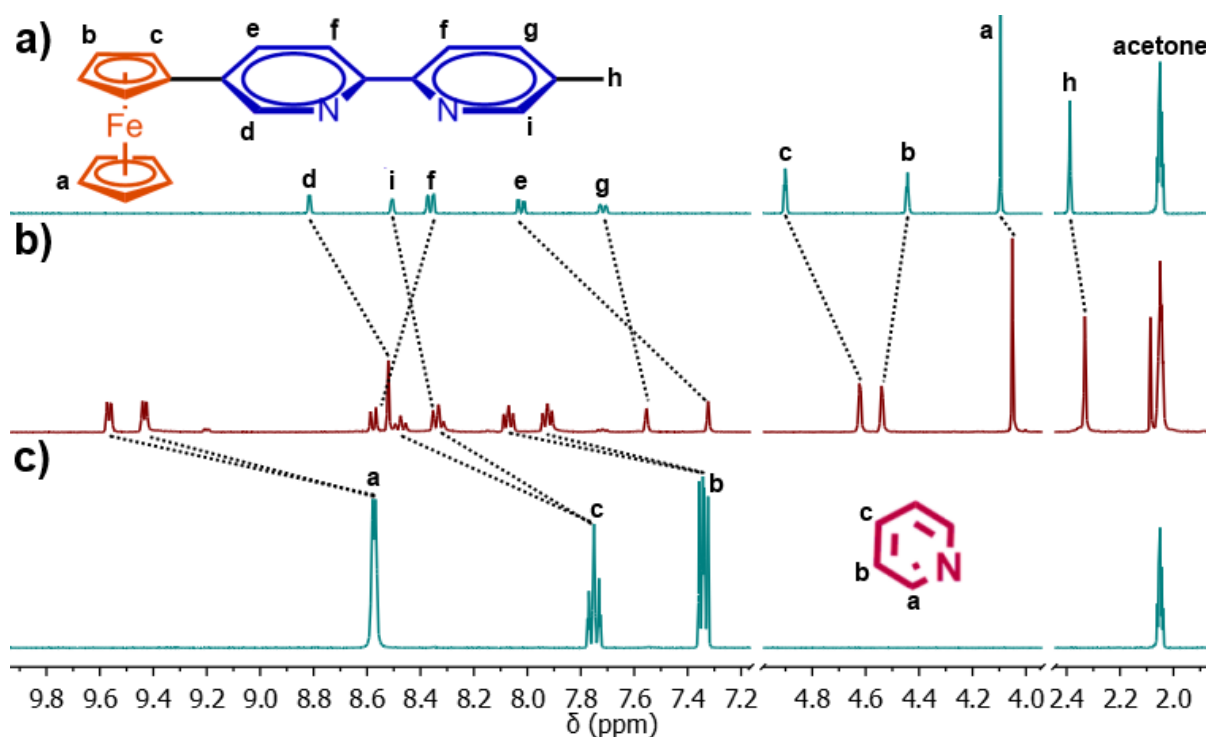

Figure S23 Stacked  $^1\text{H}$  NMR spectra ( $d_6$ -acetone, 298 K) of a) the free ligand **3b**, b) the  $\text{PdPy}_2$  complex **5b**, and c) pyridine.

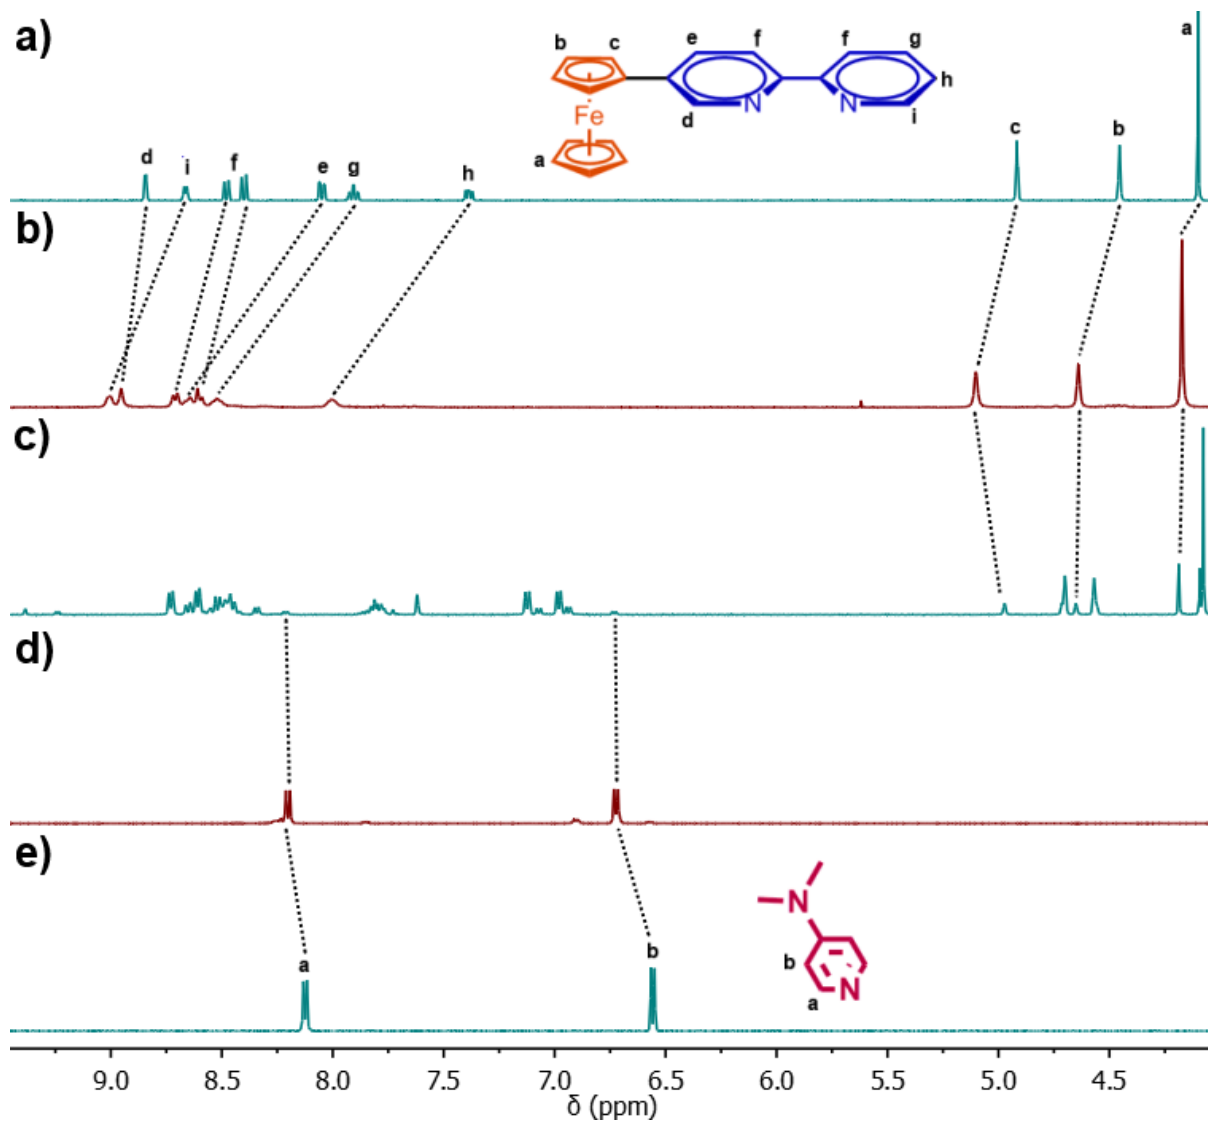

**Figure S24** Stacked  $^1\text{H}$  NMR spectra ( $d_6$ -acetone, 298 K) of a) **3a**, b)  $[\text{Pd}(\text{FcBipy})_2](\text{SbF}_6)_2$  (**9a**), c) the mixture of products resulting from the dissolution of **6a**, d)  $[\text{Pd}(\text{DMAP})_4](\text{SbF}_6)_2$  (**8**), and e) DMAP.

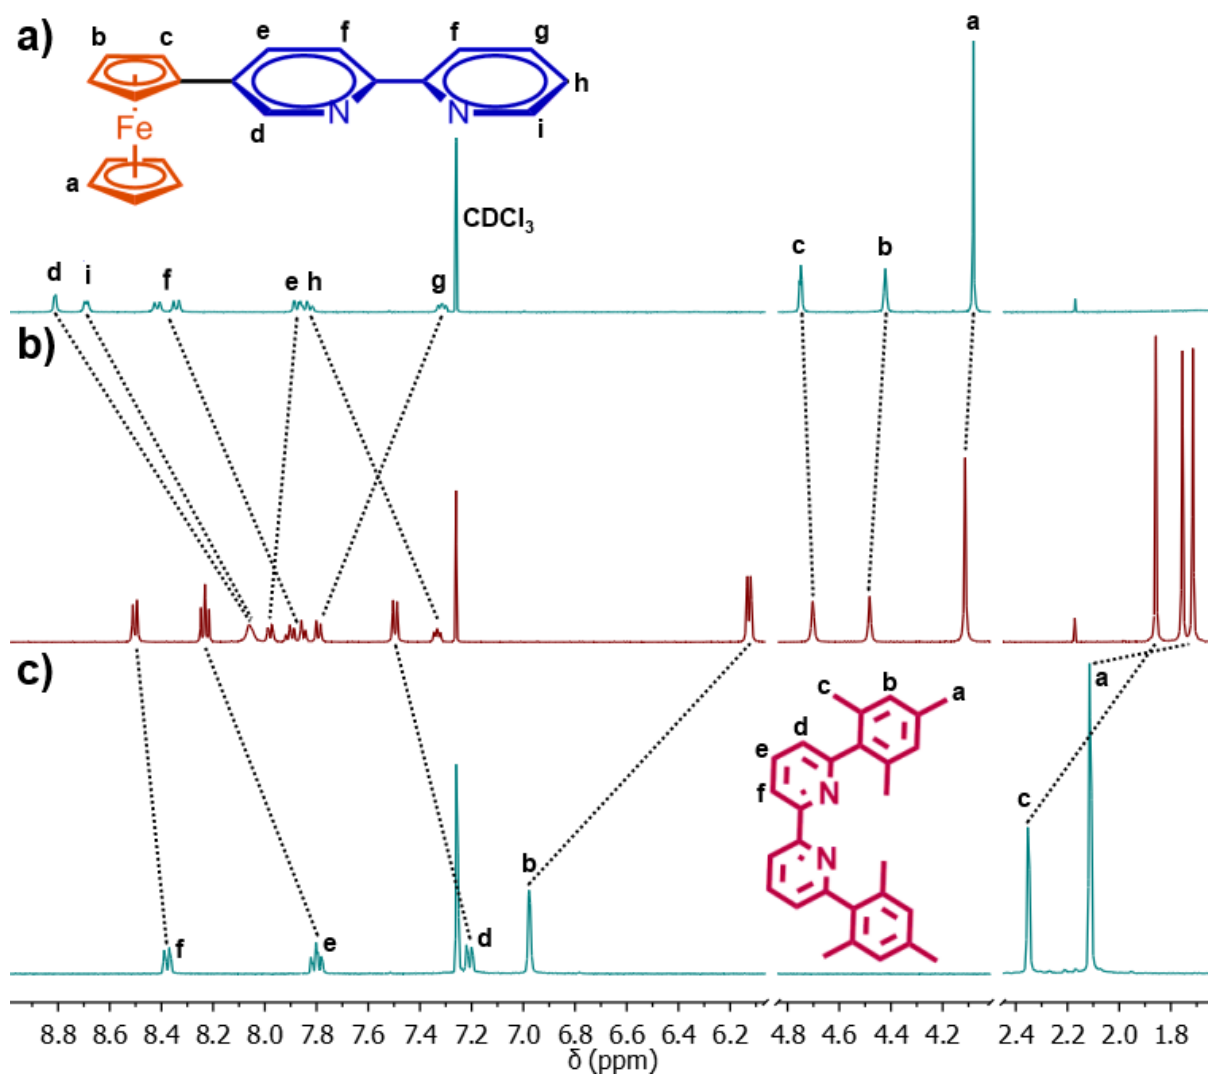

Figure S25 Stacked  $^1\text{H}$  NMR spectra (CDCl<sub>3</sub>, 298 K) of a) the free ligand **3a**, b) the Cu(I) complex **11b**, and c) the ligand **10**.

### 3 Representative Mass Spectra

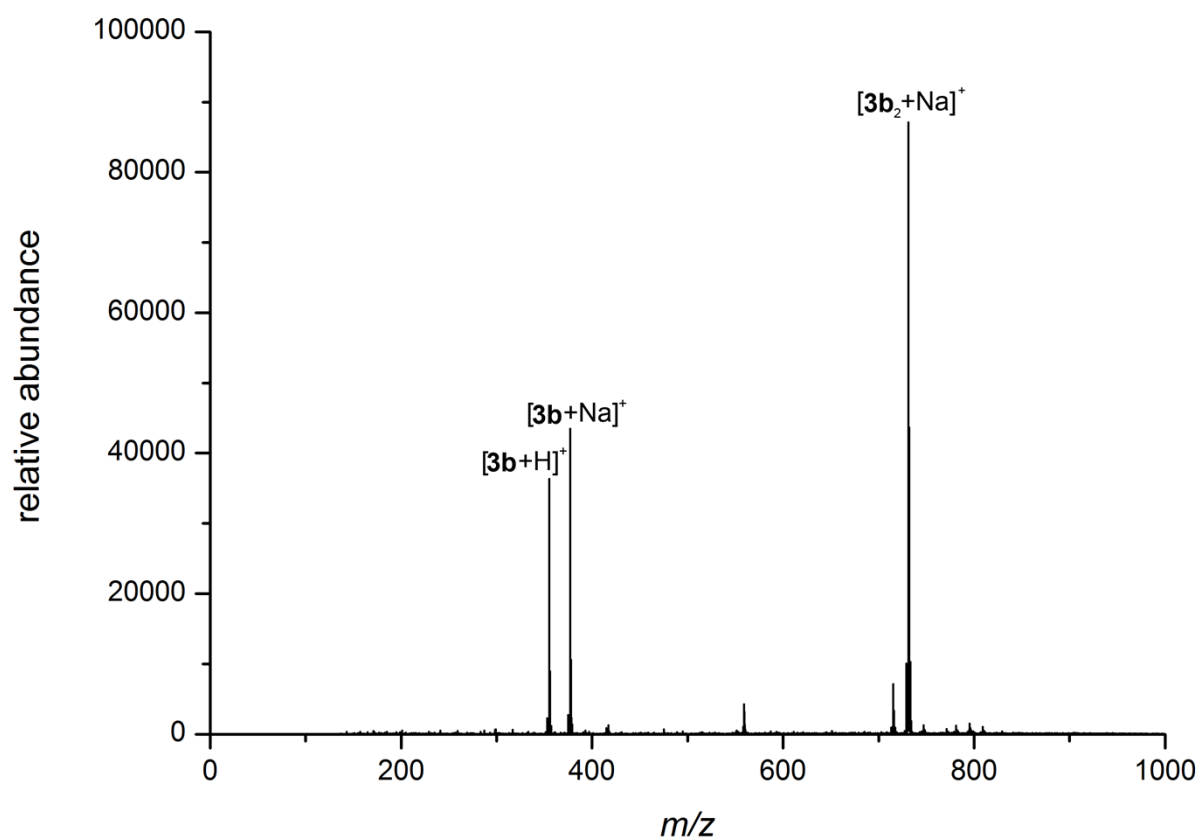

Figure S26 Full mass spectrum (MeOH) of ligand **3b** with relevant peaks annotated.

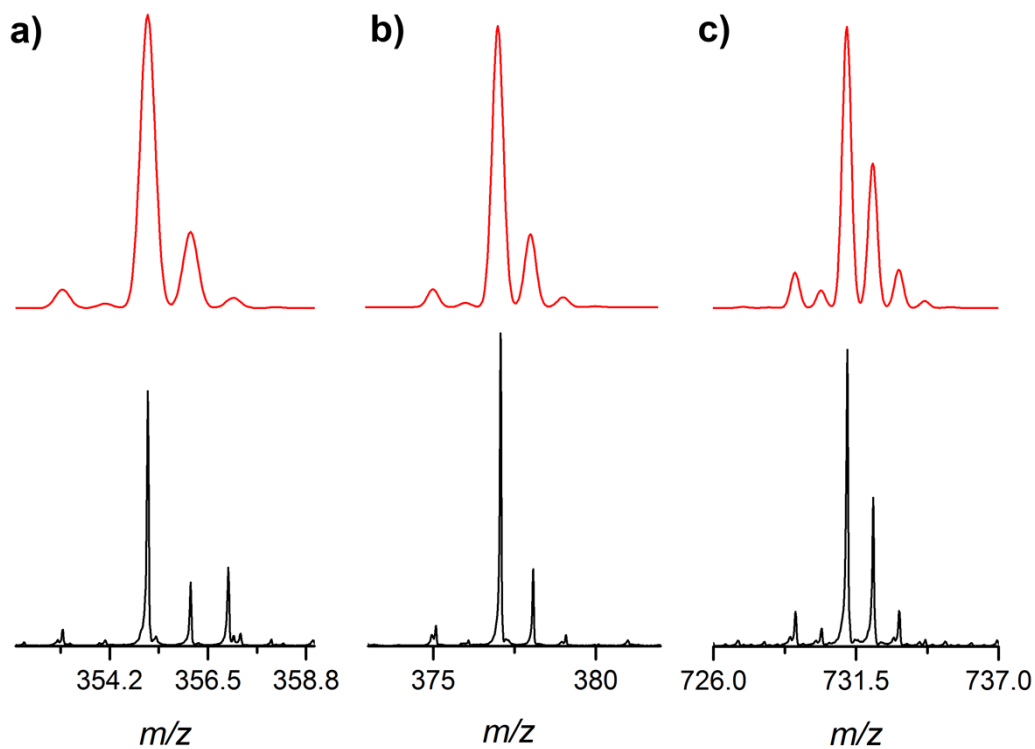

Figure S27 The calculated (red trace) and experimental (black trace) isotope patterns for a)  $[3b+H]^+$ , b)  $[3b+Na]^+$ , and c)  $[3b_2+Na]^+$ .

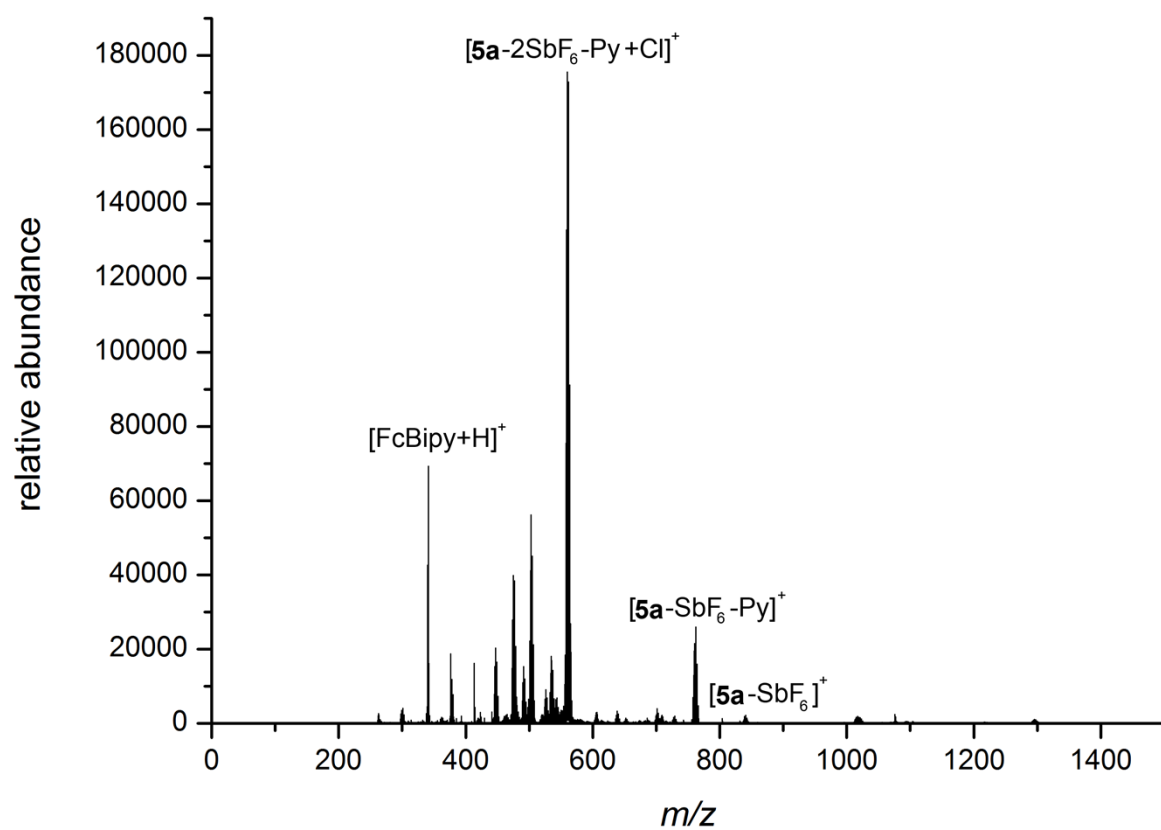

Figure S28 Full mass spectrum (MeOH/acetone) of complex **5a** with relevant peaks annotated.

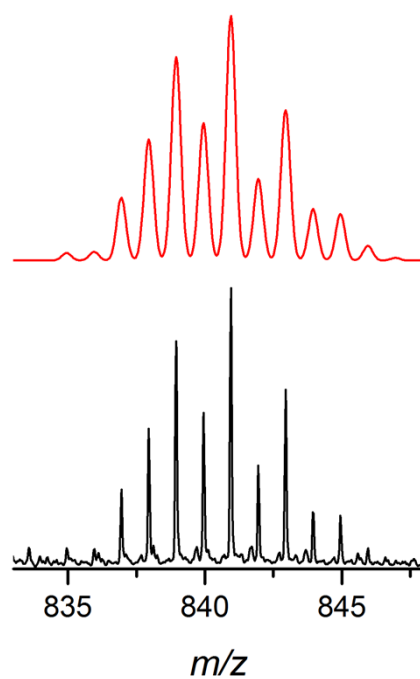

Figure S29 The calculated (red trace) and experimental (black trace) isotopic pattern of  $[5a-SbF_6]^+$ .

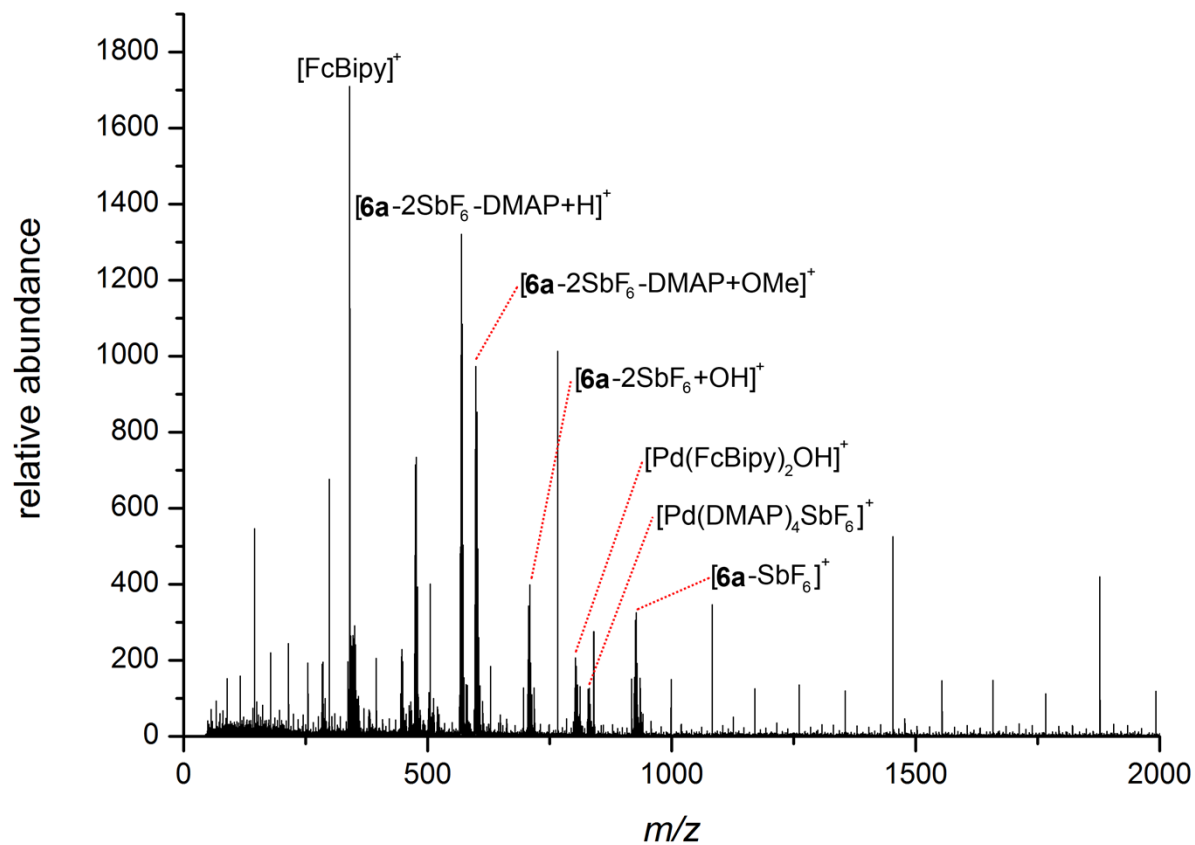

Figure S30 Full mass spectrum (MeOH/acetone) of complex **6a** with relevant peaks annotated.

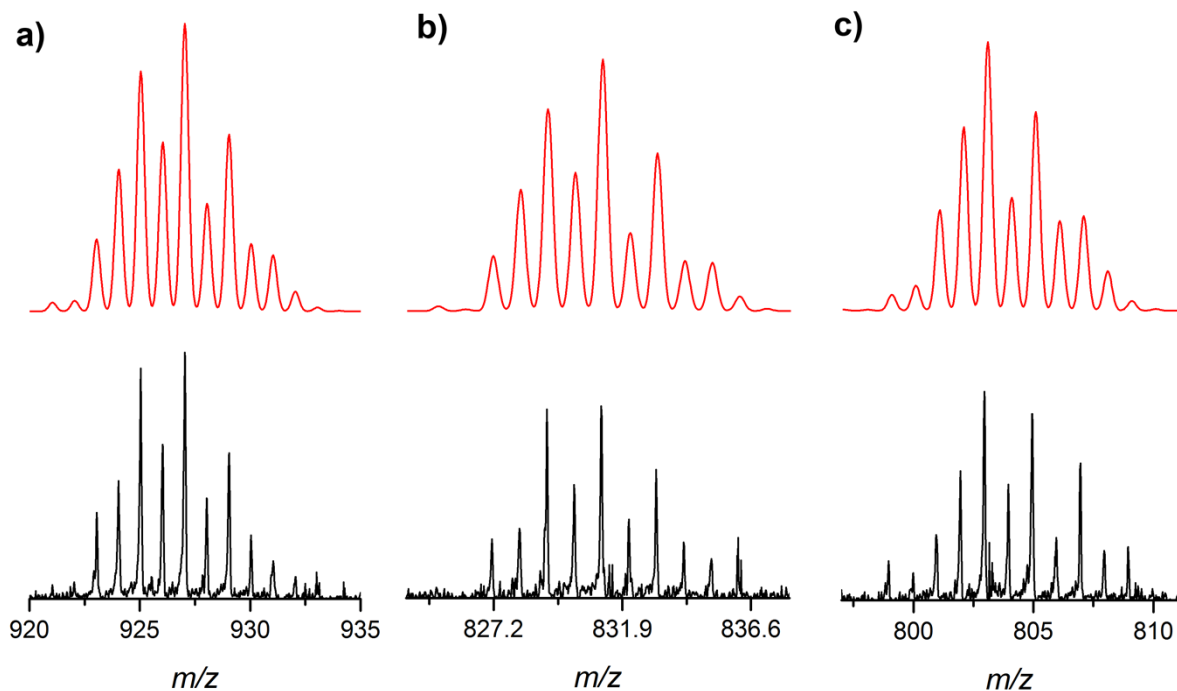

Figure S31 The calculated (red trace) and experimental (black trace) isotope patterns for a)  $[6a-SbF_6]^+$ , b)  $[Pd(DMAP)_4SbF_6]^+$ , and c)  $[Pd(FcBipy)_2OH]^+$ .



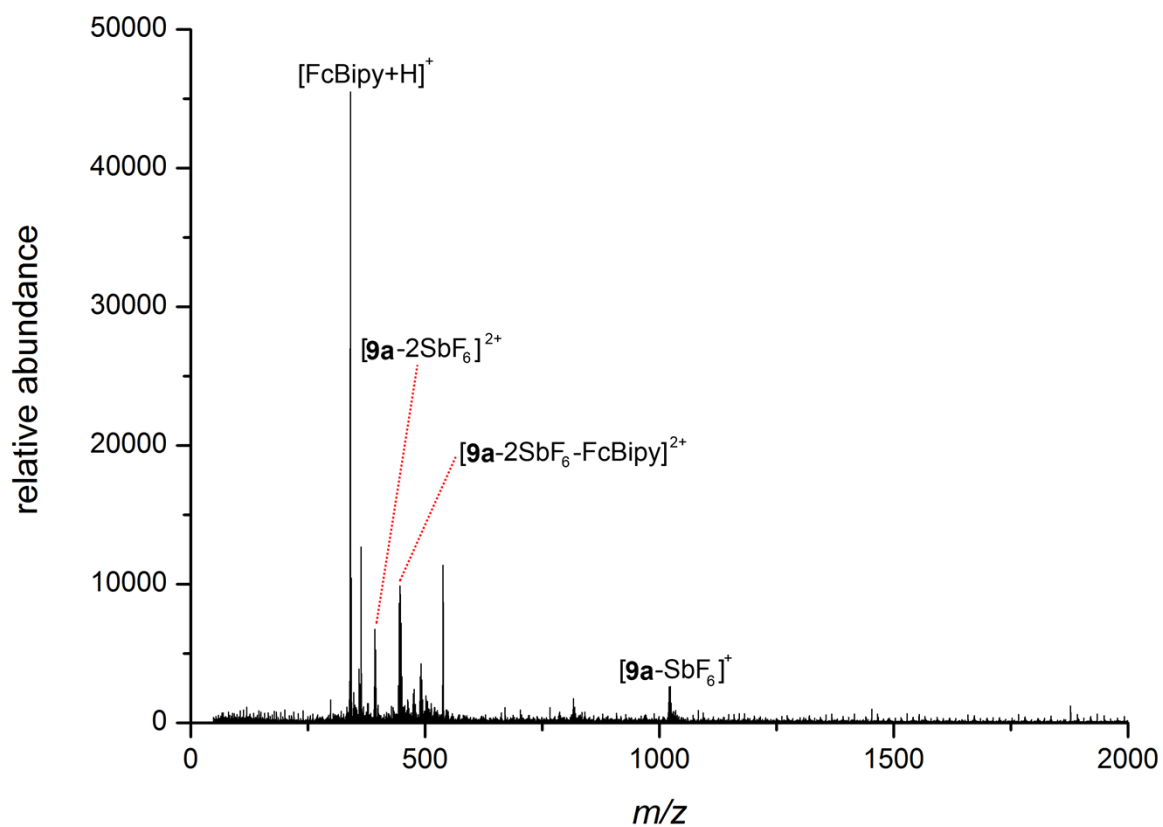

Figure S32 Full mass spectrum (MeOH/acetone) of complex **9a** with relevant peaks annotated.

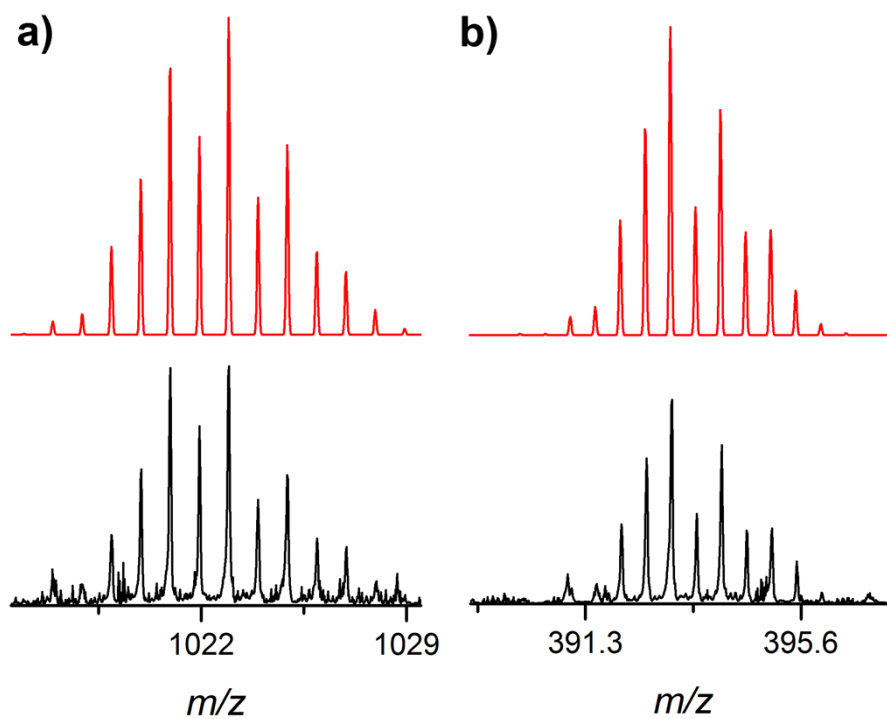

Figure S33 The calculated (red trace) and experimental (black trace) isotope patterns for a)  $[\mathbf{9a}-\text{SbF}_6]^+$ , and b)  $[\mathbf{9a}-2\text{SbF}_6]^{2+}$ .

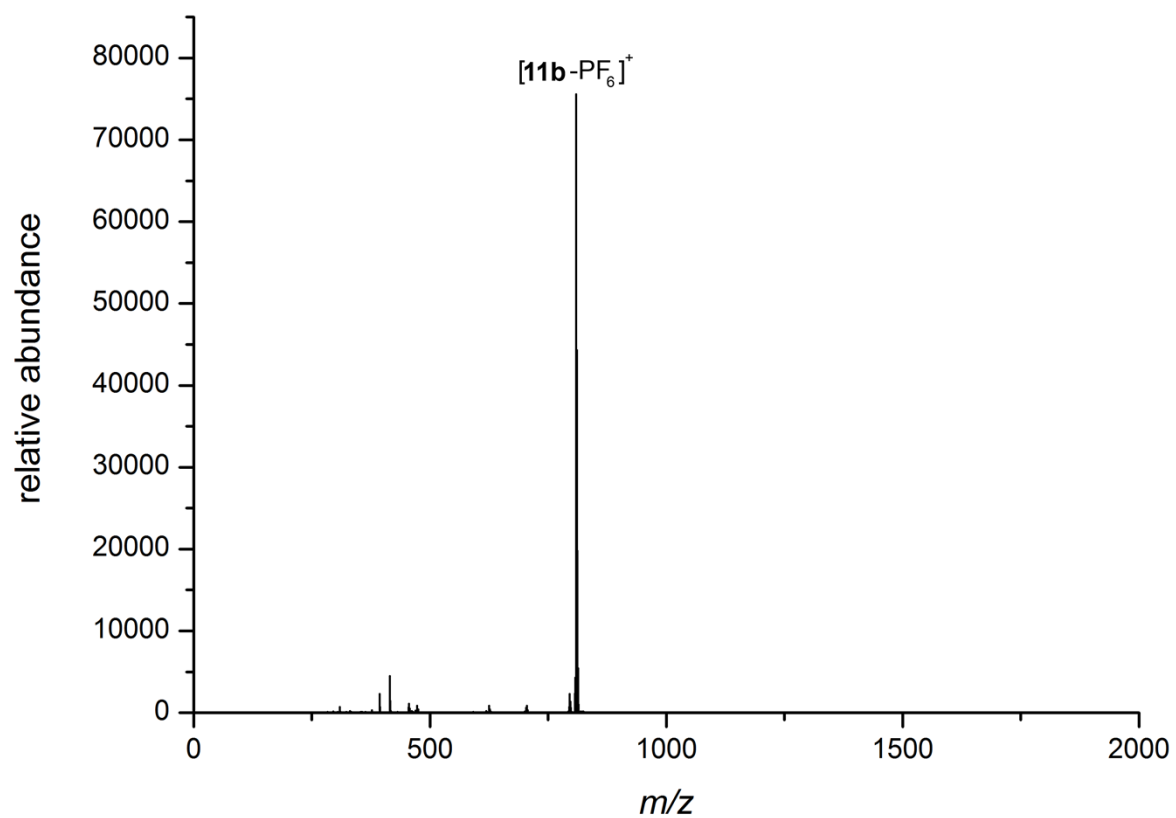

Figure S34 Full mass spectrum (MeOH) of complex **11b** with relevant peaks annotated.

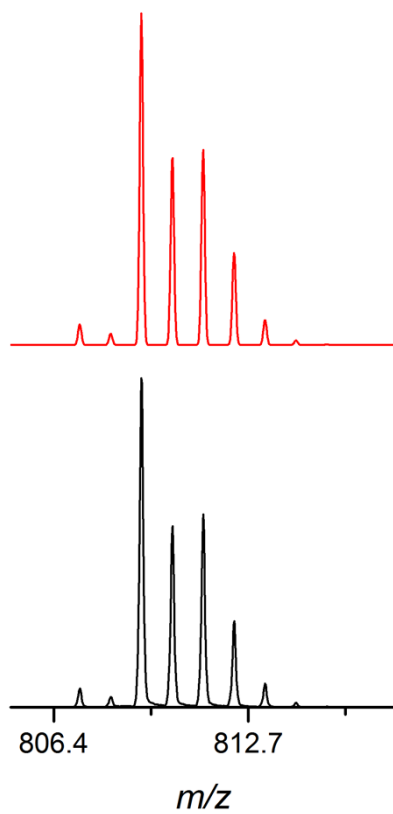

Figure S35 The calculated (red trace) and experimental (black trace) isotopic pattern of  $[11b-PF_6]^+$ .

#### 4 UV-Vis Spectra

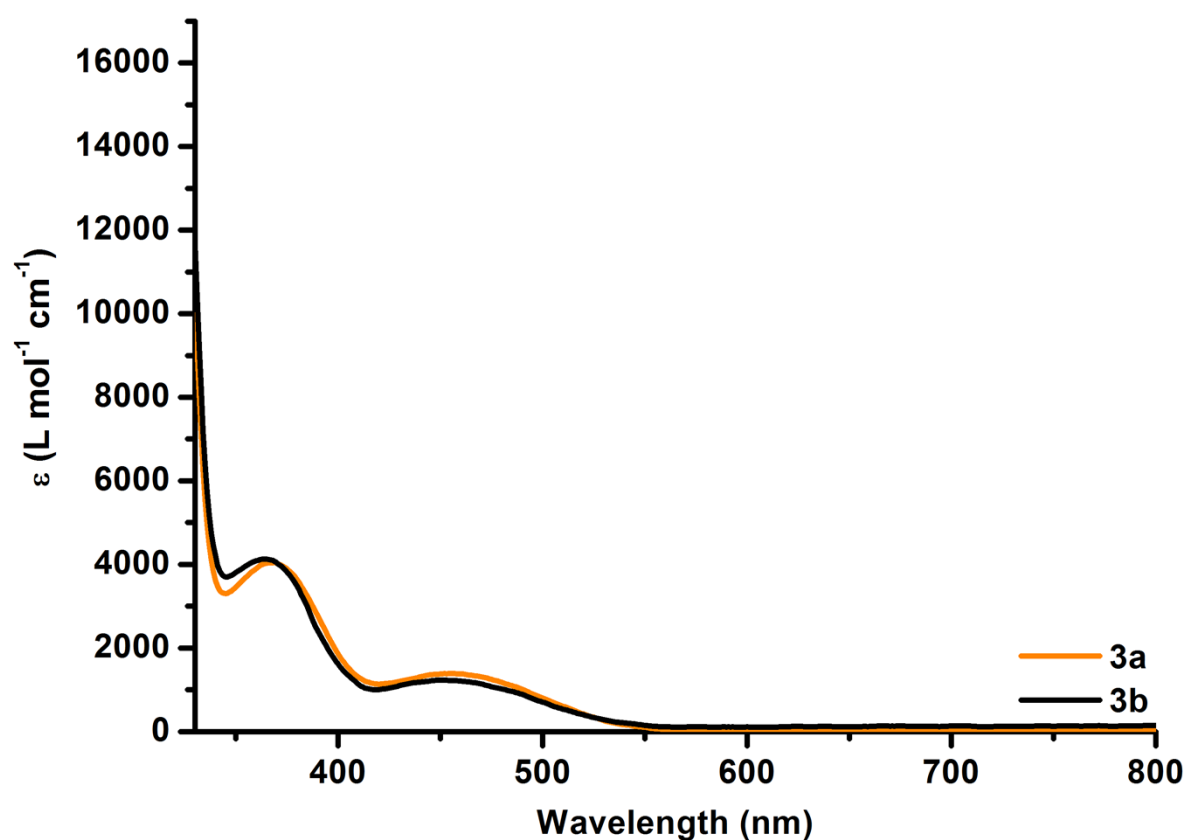

Figure S36 UV-Vis spectra of the FcBipy ligands **3a** and **3b** in acetone ( $\sim 1 \times 10^{-5}$  M).

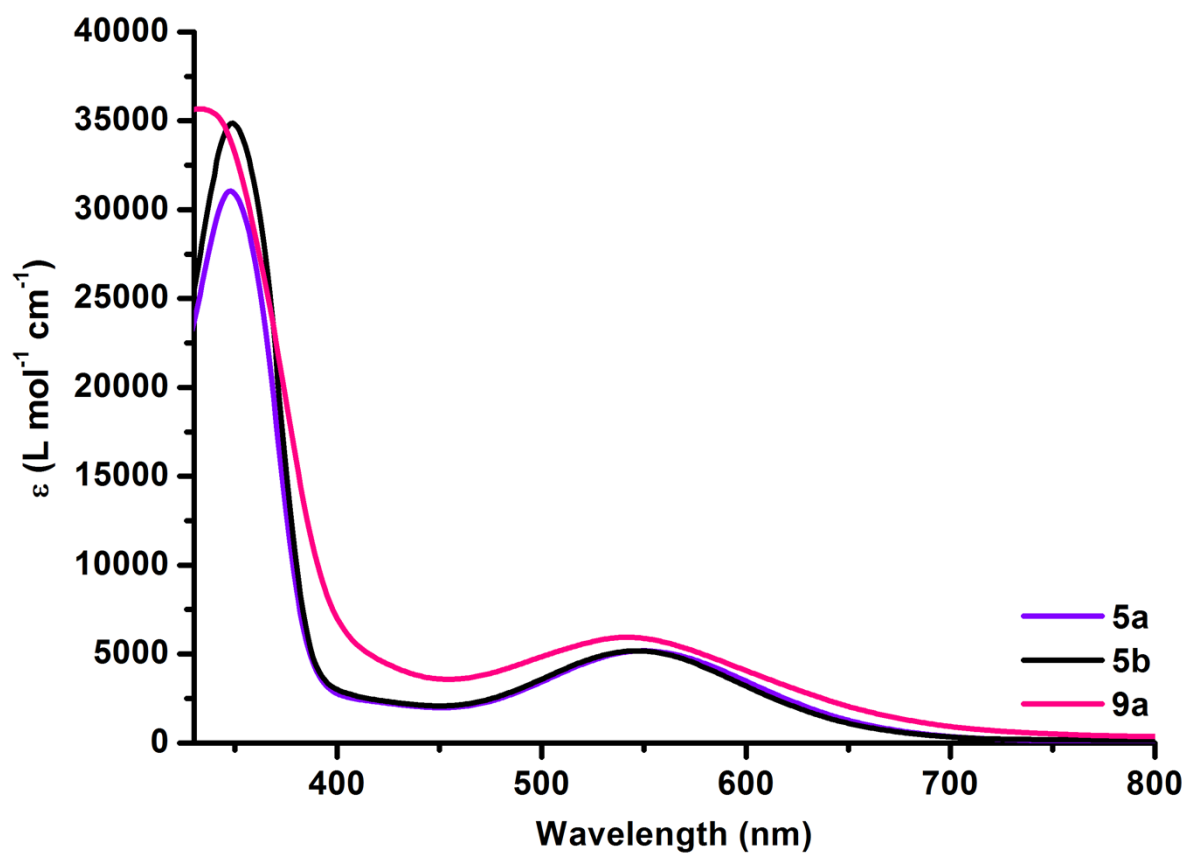

Figure S37 UV-Vis spectra of the Pd(II) complexes **5a**, **5b**, and **9a** in acetone ( $\sim 1 \times 10^{-5}$  M).

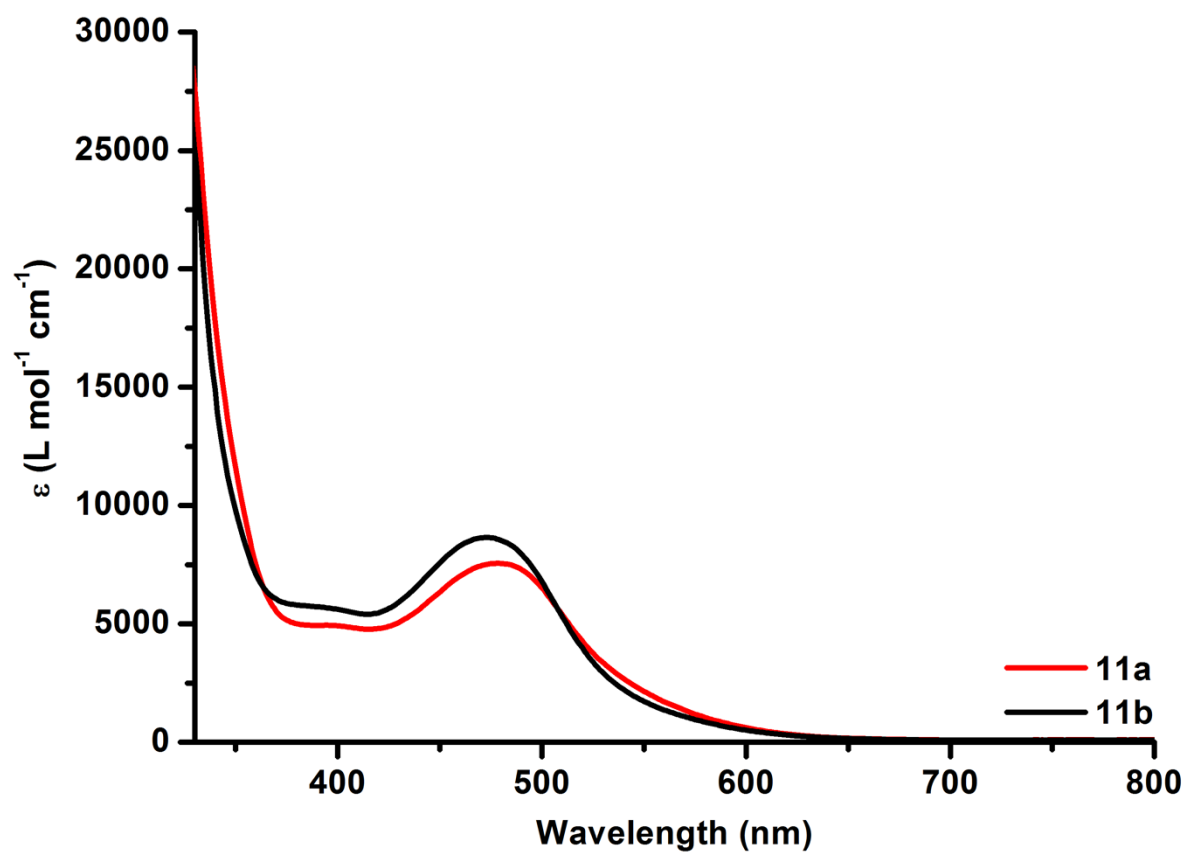

Figure S38 UV-Vis spectra of the Cu(I) complexes **11a** and **11b** in acetone ( $\sim 1 \times 10^{-5}$  M).

## 5 Electrochemistry

Cyclic voltammetric (CV) experiments on 3-ferrocenylpyridine<sup>3</sup> and selected bipyridyl complexes in acetone were performed at 20 °C on solutions degassed with argon. A three-electrode cell was used with Cypress Systems 1.4 mm diameter glassy carbon working, Ag/AgCl reference and platinum wire auxiliary electrodes. The solution was  $\sim 10^{-3}$  M in electroactive material and contained 0.1 M Bu<sub>4</sub>NPF<sub>6</sub> as the supporting electrolyte. Voltammograms were recorded with the aid of a Powerlab/4sp computer-controlled potentiostat. Potentials are referenced to the reversible formal potential (taken as  $E^\circ = 0.00$  V) for the decamethylferrocene [Fc\*]<sup>+0</sup> process.<sup>4</sup> Under the same conditions,  $E^\circ$  calculated for [Fch]<sup>+0</sup> was 0.49 V.<sup>5</sup>

Table S1 Additional electrochemical data for **3a-11b**.

| Compounds                                        | $E^\circ$ (V) (MeCN) <sup>a</sup> |                      | $E^\circ$ (V) (CH <sub>2</sub> Cl <sub>2</sub> ) <sup>a</sup> |                   |
|--------------------------------------------------|-----------------------------------|----------------------|---------------------------------------------------------------|-------------------|
|                                                  | Cu <sup>II/I</sup>                | Fc <sup>+0</sup>     | Cu <sup>II/I</sup>                                            | Fc <sup>+0</sup>  |
| 3-Fcpy                                           | -                                 | 0.58(5) <sup>3</sup> | -                                                             | 0.64 <sup>3</sup> |
| <b>3a</b>                                        | -                                 | 0.59                 | -                                                             | 0.64              |
| <b>3b</b>                                        | -                                 | 0.58(5)              | -                                                             | 0.63(5)           |
| <b>5a</b>                                        | -                                 | 0.73                 | -                                                             | insol.            |
| <b>5b</b>                                        | -                                 | 0.72                 | -                                                             | insol.            |
| <b>11a</b>                                       | 0.56                              | 0.73                 | 0.71                                                          | 0.78              |
| <b>11b</b>                                       | 0.55                              | 0.72                 | 0.71                                                          | 0.77              |
| [Cu(bipy(Mes) <sub>2</sub> bipy)]BF <sub>4</sub> | -                                 | -                    | 0.73 <sup>6</sup>                                             | -                 |

<sup>a</sup>  $1 \times 10^{-3}$  M in analyte, 0.1 M Bu<sub>4</sub>NPF<sub>6</sub>, referenced to [Fc\*]<sup>+0</sup> = 0.00 V.

### 5.1 Representative Voltammograms

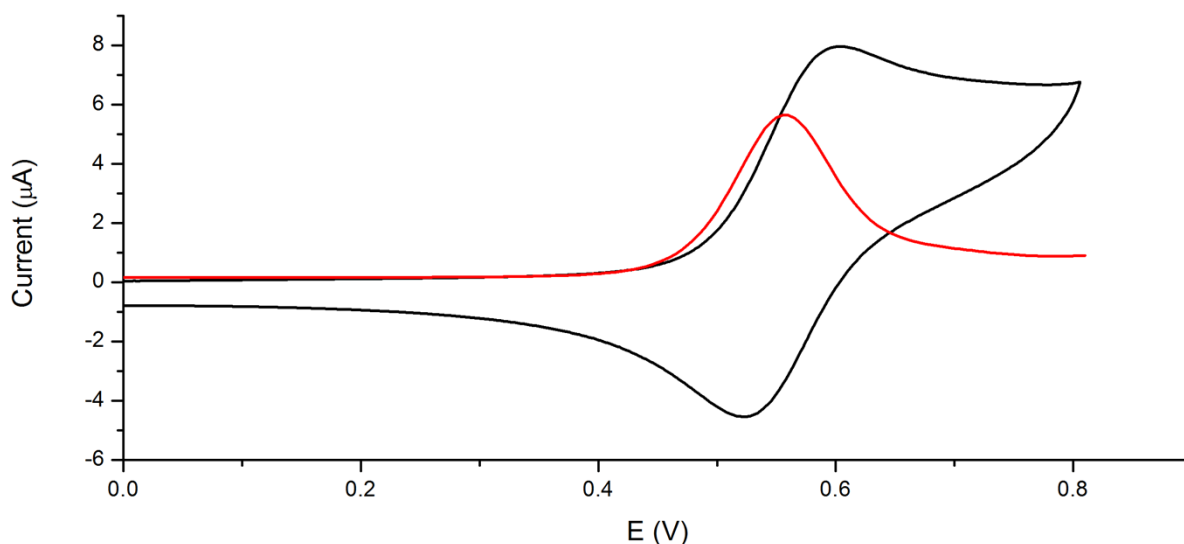

Figure S39 CV (black trace, 100 mV s<sup>-1</sup>) and DPV (red trace) of the ligand **3b** in acetone.

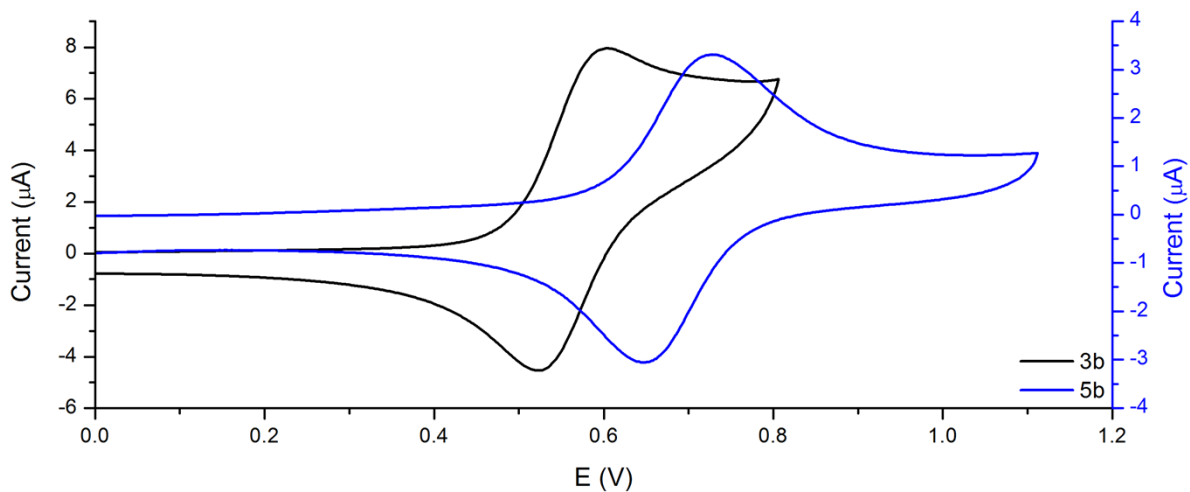

Figure S40 CVs ( $100 \text{ mV s}^{-1}$ ) of the ligand **3b** and the Pd(II) complex **5b** in acetone.

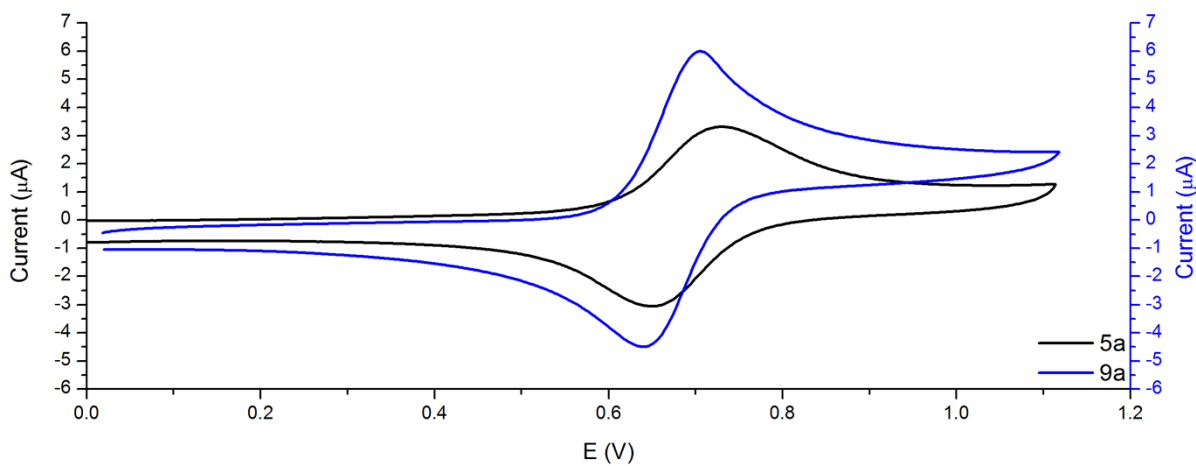

Figure S41 CVs ( $100 \text{ mV s}^{-1}$ ) of the Pd(II) complex **5a** and the Pd(II) complex **9a** in acetone.

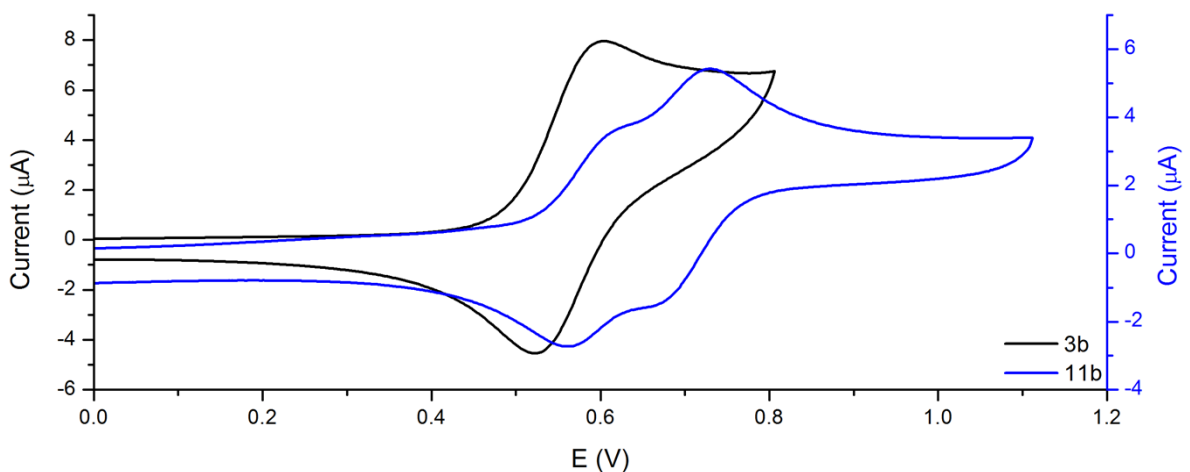

Figure S42 CVs ( $100 \text{ mV s}^{-1}$ ) of the ligand **3b** and the Cu(I) complex **11b** in acetone.

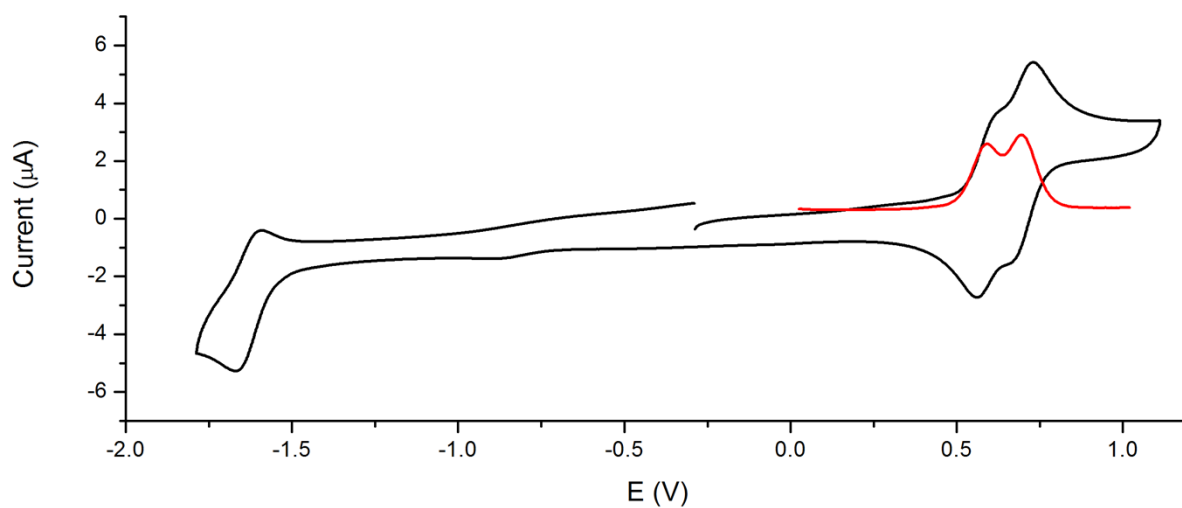

**Figure S43** Full sweep CV ( $100 \text{ mV s}^{-1}$ ) of the Cu(I) complex **11b** (black trace) and the DPV of the oxidation area of interest (red trace) in acetone.

## 6 X-ray Data

### 6.1 Crystallographic Data Tables

| Compound                          | <b>3a</b>                                                                                     | <b>3a</b>                                                                                    | <b>4b</b>                                                                                             |
|-----------------------------------|-----------------------------------------------------------------------------------------------|----------------------------------------------------------------------------------------------|-------------------------------------------------------------------------------------------------------|
| Empirical formula                 | C <sub>20</sub> H <sub>16</sub> FeN <sub>2</sub>                                              | C <sub>20</sub> H <sub>16</sub> FeN <sub>2</sub>                                             | C <sub>21</sub> H <sub>18</sub> Cl <sub>2</sub> FeN <sub>2</sub> Pd                                   |
| Formula weight                    | 340.20                                                                                        | 340.20                                                                                       | 531.55                                                                                                |
| Temperature                       | 93(2) K                                                                                       | 90(2) K                                                                                      | 89(2) K                                                                                               |
| Wavelength                        | 0.71073 Å                                                                                     | 0.71073 Å                                                                                    | 0.71073 Å                                                                                             |
| Crystal system                    | Monoclinic                                                                                    | Orthorhombic                                                                                 | Monoclinic                                                                                            |
| Space group                       | <i>P2<sub>1</sub>/c</i>                                                                       | <i>Pccn</i>                                                                                  | <i>P2<sub>1</sub>/c</i>                                                                               |
| Unit cell dimensions              | a = 10.186(2) Å    α = 90°<br>b = 12.531(3) Å    β = 92.469(7)°<br>c = 11.828(2) Å    γ = 90° | a = 13.0963(23) Å    α = 90°<br>b = 20.1531(35) Å    β = 90°<br>c = 11.7129(24) Å    γ = 90° | a = 16.5082(5) Å    α = 90°<br>b = 7.4003(2) Å    β =<br>113.5980(10)°<br>c = 16.7660(5) Å    γ = 90° |
| Volume                            | 1508.3(5) Å <sup>3</sup>                                                                      | 3091.4(9) Å <sup>3</sup>                                                                     | 1876.95(9) Å <sup>3</sup>                                                                             |
| Z                                 | 4                                                                                             | 8                                                                                            | 4                                                                                                     |
| Density (calculated)              | 1.498 Mg/m <sup>3</sup>                                                                       | 1.462 Mg/m <sup>3</sup>                                                                      | 1.888 Mg/m <sup>3</sup>                                                                               |
| Absorption coefficient            | 1.000 mm <sup>-1</sup>                                                                        | 0.975 mm <sup>-1</sup>                                                                       | 2.024 mm <sup>-1</sup>                                                                                |
| F(000)                            | 704                                                                                           | 1408                                                                                         | 1056                                                                                                  |
| Crystal size                      | 0.41 x 0.24 x 0.08 mm <sup>3</sup>                                                            | 0.39 x 0.26 x 0.09 mm <sup>3</sup>                                                           | 0.34 x 0.24 x 0.20 mm <sup>3</sup>                                                                    |
| Theta range for data collection   | 3.05 to 22.89°                                                                                | 2.54 to 22.25°                                                                               | 1.35 to 26.46°                                                                                        |
| Index ranges                      | -11<=h<=11, -13<=k<=13, -10<=l<=12                                                            | -13<=h<=12, -21<=k<=21, -12<=l<=12                                                           | -20<=h<=20, -9<=k<=6, -21<=l<=20                                                                      |
| Reflections collected             | 11348                                                                                         | 12480                                                                                        | 13161                                                                                                 |
| Independent reflections           | 2057 [R(int) = 0.0510]                                                                        | 1959 [R(int) = 0.0518]                                                                       | 3844 [R(int) = 0.0340]                                                                                |
| Completeness                      | 99.2% (theta = 22.89°)                                                                        | 99.8% (theta = 22.25°)                                                                       | 99.2% (theta = 26.46°)                                                                                |
| Max. and min. transmission        | 0.9243 and 0.6847                                                                             | 0.92 and 0.6469                                                                              | 0.6876 and 0.5461                                                                                     |
| Data / restraints / parameters    | 2057 / 0 / 208                                                                                | 1959 / 0 / 208                                                                               | 3844 / 0 / 245                                                                                        |
| Goodness-of-fit on F <sup>2</sup> | 1.124                                                                                         | 1.087                                                                                        | 1.218                                                                                                 |
| Final R indices [I>2sigma(I)]     | R1 = 0.0577, wR2 = 0.1847                                                                     | R1 = 0.0320, wR2 = 0.0840                                                                    | R1 = 0.0271, wR2 = 0.0752                                                                             |
| R indices (all data)              | R1 = 0.0660, wR2 = 0.1929                                                                     | R1 = 0.0369, wR2 = 0.0885                                                                    | R1 = 0.0337, wR2 = 0.0922                                                                             |
| Largest diff. peak and hole       | 1.700 and -0.480 e.Å <sup>-3</sup>                                                            | 0.262 and -0.422 e.Å <sup>-3</sup>                                                           | 0.570 and -0.556 e.Å <sup>-3</sup>                                                                    |



| Compound                          | <b>5a</b>                                                                                           | <b>6a</b>                                                                                                         | <b>6b</b>                                                                                                      |
|-----------------------------------|-----------------------------------------------------------------------------------------------------|-------------------------------------------------------------------------------------------------------------------|----------------------------------------------------------------------------------------------------------------|
| Empirical formula                 | C <sub>30</sub> H <sub>26</sub> F <sub>12</sub> FeN <sub>4</sub> PdSb <sub>2</sub>                  | C <sub>38</sub> H <sub>42</sub> F <sub>12</sub> FeN <sub>8</sub> PdSb <sub>2</sub>                                | C <sub>37</sub> H <sub>41</sub> F <sub>12</sub> FeN <sub>7</sub> PdSb <sub>2</sub>                             |
| Formula weight                    | 1076.30                                                                                             | 1244.55                                                                                                           | 1217.52                                                                                                        |
| Temperature                       | 89(2) K                                                                                             | 89(2) K                                                                                                           | 90(2) K                                                                                                        |
| Wavelength                        | 0.71073 Å                                                                                           | 0.71069 Å                                                                                                         | 0.71073 Å                                                                                                      |
| Crystal system                    | Monoclinic                                                                                          | Triclinic                                                                                                         | Triclinic                                                                                                      |
| Space group                       | <i>C2/c</i>                                                                                         | <i>P-1</i>                                                                                                        | <i>P-1</i>                                                                                                     |
| Unit cell dimensions              | a = 31.201(4) Å      α = 90°<br>b = 11.3669(11) Å    β = 95.873(4)°<br>c = 19.088(2) Å      γ = 90° | a = 11.635(2) Å      α = 67.083(7)°<br>b = 13.391(2) Å      β = 84.398(7)°<br>c = 15.929(2) Å      γ = 82.022(7)° | a = 10.353(7) Å      α = 73.09(3)°<br>b = 14.768(9) Å      β = 73.84(3)°<br>c = 15.121(10) Å     γ = 74.59(3)° |
| Volume                            | 6734.2(12) Å <sup>3</sup>                                                                           | 2261.2(6) Å <sup>3</sup>                                                                                          | 2081(2) Å <sup>3</sup>                                                                                         |
| Z                                 | 8                                                                                                   | 2                                                                                                                 | 2                                                                                                              |
| Density (calculated)              | 2.123 Mg/m <sup>3</sup>                                                                             | 1.828 Mg/m <sup>3</sup>                                                                                           | 1.943 Mg/m <sup>3</sup>                                                                                        |
| Absorption coefficient            | 2.631 mm <sup>-1</sup>                                                                              | 1.975 mm <sup>-1</sup>                                                                                            | 2.143 mm <sup>-1</sup>                                                                                         |
| F(000)                            | 4128                                                                                                | 1216                                                                                                              | 1188                                                                                                           |
| Crystal size                      | 0.22 x 0.21 x 0.05 mm <sup>3</sup>                                                                  | 0.78 x 0.24 x 0.08 mm <sup>3</sup>                                                                                | 0.20 x 0.17 x 0.05 mm <sup>3</sup>                                                                             |
| Theta range for data collection   | 1.31 to 26.51°                                                                                      | 2.64 to 25.5°                                                                                                     | 1.44 to 21.92°                                                                                                 |
| Index ranges                      | -39<=h<=38, 0<=k<=14, 0<=l<=23                                                                      | -14<=h<=14, -16<=k<=16, -17<=l<=19                                                                                | -10<=h<=10, -15<=k<=14, -15<=l<=15                                                                             |
| Reflections collected             | 13014                                                                                               | 32184                                                                                                             | 17648                                                                                                          |
| Independent reflections           | 13014 [R(int) = 0.0000]                                                                             | 8362 [R(int) = 0.0322]                                                                                            | 4754 [R(int) = 0.0693]                                                                                         |
| Completeness                      | 99.0% (theta = 26.51°)                                                                              | 99.4% (theta = 25.5°)                                                                                             | 94.0% (theta = 21.9°)                                                                                          |
| Max. and min. transmission        | 0.8841 and 0.5952                                                                                   | 0.857 and 0.578                                                                                                   | 0.9004 and 0.6739                                                                                              |
| Data / restraints / parameters    | 13014 / 0 / 452                                                                                     | 8362 / 30 / 609                                                                                                   | 4754 / 0 / 547                                                                                                 |
| Goodness-of-fit on F <sup>2</sup> | 1.011                                                                                               | 1.03                                                                                                              | 1.071                                                                                                          |
| Final R indices [I>2sigma(I)]     | R1 = 0.0603, wR2 = 0.1565                                                                           | R1 = 0.0246, wR2 = 0.056                                                                                          | R1 = 0.0471, wR2 = 0.1182                                                                                      |
| R indices (all data)              | R1 = 0.0866, wR2 = 0.1693                                                                           | R1 = 0.0287, wR2 = 0.0589                                                                                         | R1 = 0.0687, wR2 = 0.1282                                                                                      |
| Largest diff. peak and hole       | 1.046 and -1.007 e.Å <sup>-3</sup>                                                                  | 0.515 and -0.638 e.Å <sup>-3</sup>                                                                                | 0.882 and -1.014 e.Å <sup>-3</sup>                                                                             |

| Compound                          | <b>11a</b>                                                                                          | <b>11b</b>                                                                               | <b>7</b>                                                                                        |
|-----------------------------------|-----------------------------------------------------------------------------------------------------|------------------------------------------------------------------------------------------|-------------------------------------------------------------------------------------------------|
| Empirical formula                 | C <sub>48</sub> H <sub>44</sub> CuF <sub>6</sub> FeN <sub>4</sub> P                                 | C <sub>49</sub> H <sub>46</sub> CuF <sub>6</sub> FeN <sub>4</sub> P•5.5H <sub>2</sub> O  | C <sub>26</sub> H <sub>32</sub> F <sub>12</sub> N <sub>4</sub> O <sub>2</sub> PdSb <sub>2</sub> |
| Formula weight                    | 941.23                                                                                              | 1054.34                                                                                  | 1010.46                                                                                         |
| Temperature                       | 90(2) K                                                                                             | 90(2) K                                                                                  | 90(2) K                                                                                         |
| Wavelength                        | 0.71073 Å                                                                                           | 0.71073 Å                                                                                | 0.71069 Å                                                                                       |
| Crystal system                    | Monoclinic                                                                                          | Tetragonal                                                                               | Monoclinic                                                                                      |
| Space group                       | <i>P</i> 2 <sub>1</sub> / <i>n</i>                                                                  | <i>I</i> 4 <sub>1</sub> / <i>a</i>                                                       | <i>P</i> 2 <sub>1</sub> / <i>n</i>                                                              |
| Unit cell dimensions              | a = 12.6769(12) Å    α = 90°<br>b = 17.8460(16) Å    β = 98.382(5)°<br>c = 18.8833(16) Å    γ = 90° | a = 39.118(3) Å    α = 90°<br>b = 39.118(3) Å    β = 90°<br>c = 12.8349(11) Å    γ = 90° | a = 8.745(5) Å    α = 90°<br>b = 19.021(5) Å    β = 98.519(5)°<br>c = 10.628(5) Å    γ = 90°    |
| Volume                            | 4226.4(7) Å <sup>3</sup>                                                                            | 19640(3) Å <sup>3</sup>                                                                  | 1748.3(14) Å <sup>3</sup>                                                                       |
| Z                                 | 4                                                                                                   | 16                                                                                       | 2                                                                                               |
| Density (calculated)              | 1.479 Mg/m <sup>3</sup>                                                                             | 1.426 Mg/m <sup>3</sup>                                                                  | 1.919 Mg/m <sup>3</sup>                                                                         |
| Absorption coefficient            | 0.951 mm <sup>-1</sup>                                                                              | 0.835 mm <sup>-1</sup>                                                                   | 2.137 mm <sup>-1</sup>                                                                          |
| F(000)                            | 1936                                                                                                | 7927                                                                                     | 976                                                                                             |
| Crystal size                      | 0.82 x 0.49 x 0.08 mm <sup>3</sup>                                                                  | 0.90 x 0.60 x 0.43 mm <sup>3</sup>                                                       | 0.51 x 0.32 x 0.19 mm <sup>3</sup>                                                              |
| Theta range for data collection   | 1.58 to 26.42°                                                                                      | 1.04 to 26.46°                                                                           | 2.21 to 25.50°                                                                                  |
| Index ranges                      | -15<=h<=15, -22<=k<=22, -23<=l<=23                                                                  | -48<=h<=48, -48<=k<=48, -16<=l<=15                                                       | -10<=h<=10, -23<=k<=23, -12<=l<=12                                                              |
| Reflections collected             | 97906                                                                                               | 136258                                                                                   | 42952                                                                                           |
| Independent reflections           | 8666 [R(int) = 0.0676]                                                                              | 10065 [R(int) = 0.0731]                                                                  | 3257 [R(int) = 0.0412]                                                                          |
| Completeness                      | 99.6% (theta = 26.42°)                                                                              | 99.3% (theta = 26.46°)                                                                   | 99.8% (theta = 25.50°)                                                                          |
| Max. and min. transmission        | 0.7454 and 0.6340                                                                                   | 0.7195 and 0.5258                                                                        | 0.7464 and 0.5749                                                                               |
| Data / restraints / parameters    | 8666 / 0 / 556                                                                                      | 10065 / 0 / 566                                                                          | 3257 / 0 / 216                                                                                  |
| Goodness-of-fit on F <sup>2</sup> | 1.071                                                                                               | 1.141                                                                                    | 1.182                                                                                           |
| Final R indices [I>2sigma(I)]     | R1 = 0.0471, wR2 = 0.1078                                                                           | R1 = 0.0552, wR2 = 0.1278                                                                | R1 = 0.0375, wR2 = 0.0995                                                                       |
| R indices (all data)              | R1 = 0.0577, wR2 = 0.1142                                                                           | R1 = 0.0712, wR2 = 0.1331                                                                | R1 = 0.0406, wR2 = 0.1013                                                                       |
| Largest diff. peak and hole       | 0.555 and -0.465 e.Å <sup>-3</sup>                                                                  | 0.348 and -0.386 e.Å <sup>-3</sup>                                                       | 2.385 and -0.784 e.Å <sup>-3</sup>                                                              |

## 6.2 Crystal Structures and Relevant Notes

The structures were collected on a Bruker Kappa Apex II area detector diffractometer using monochromated Mo K $\alpha$  radiation at low temperature (89-93 K). SADABS<sup>7</sup> was used for absorption correction. The structures were solved by direct methods using SIR-97<sup>8</sup> or X-Seed<sup>9</sup> and refined against F<sup>2</sup> using anisotropic thermal displacement parameters for all non-hydrogen atoms using SHELXL-97<sup>10</sup> software. Hydrogen atoms were placed in calculated positions and refined using a riding model.

The structure for **5a** was found to be a two-component non-merohedral twin, thus the TWINABS function within PLATON was used to give multi-component absorption corrections.

Due to the extent of disordered solvent molecules in the crystal lattice of **11b**, the SQUEEZE routine within PLATON was implemented. SQUEEZE details are listed below, beneath the relevant structure, as well as in the relevant CIF.

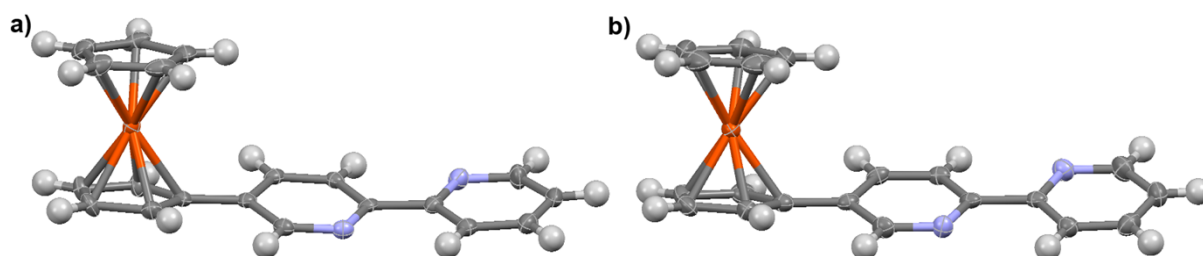

**Figure S44** Mercury ellipsoid plots of **3a** in a) monoclinic and b) orthorhombic polymorphs. Ellipsoids are shown at the 50% probability level.

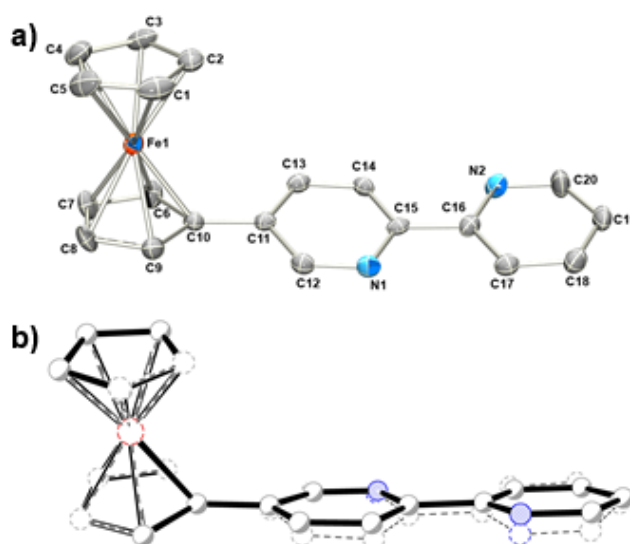

**Figure S45** a) One of two collected crystal structures of ligand **3a** showing ellipsoids at the 50% probability level, and b) the two structures of **3a** overlaid to show the 5.62° difference in torsion angle between the ferrocene and the bipyridine.

Hydrogens are omitted for clarity.

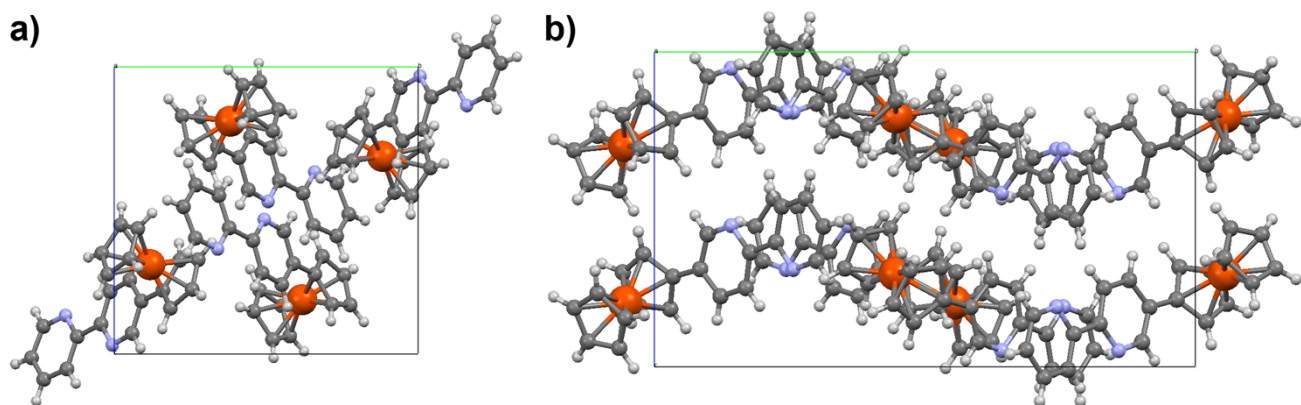

**Figure S46** Crystal packing of ligand **3a** seen down the 'a' axis in the a) monoclinic, and b) orthorhombic crystal structures.

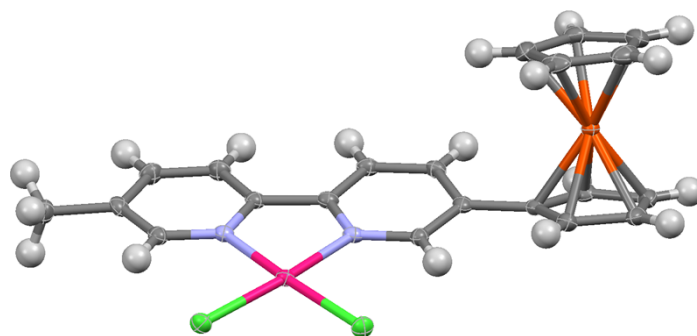

**Figure S47** Mercury ellipsoid plot of **4b**. Ellipsoids are shown at the 50% probability level.

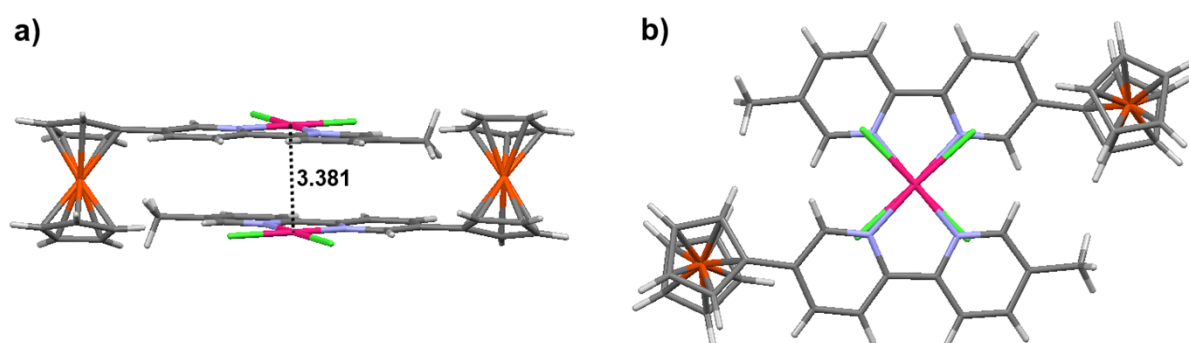

**Figure S48** a) Side view of the head-to-tail **4b** dimer with the Pd-Pd metal interaction measured in Å, and b) the top-down view along the Pd-Pd interaction.

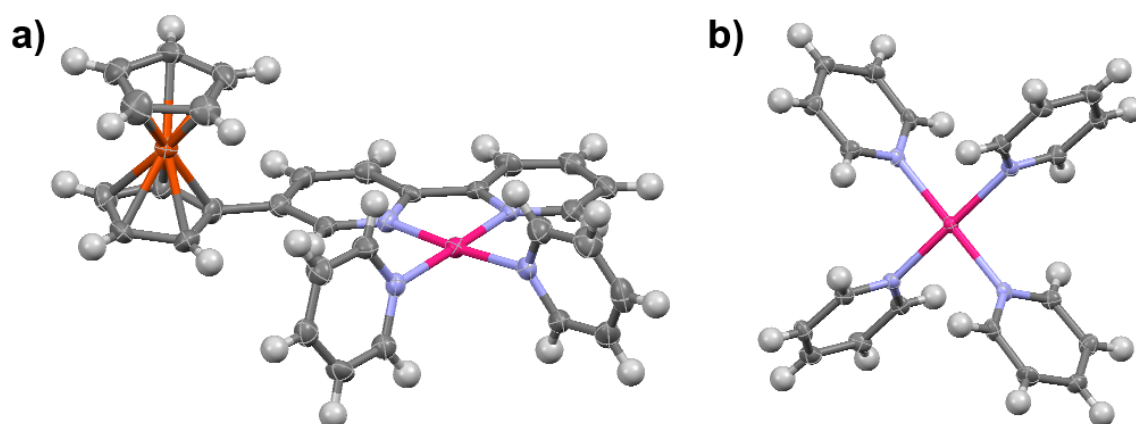

**Figure S49** Mercury ellipsoid plots of a) **5a** and b) the  $[\text{Pd}(\text{Py})_4]^{2+}$  side product **7**. Solvent and counterions are omitted for clarity. Ellipsoids are shown at the 50% probability level. **5a** was a two-component non-merohedral twin wherein TWINABS was used to give multi-component absorption corrections.

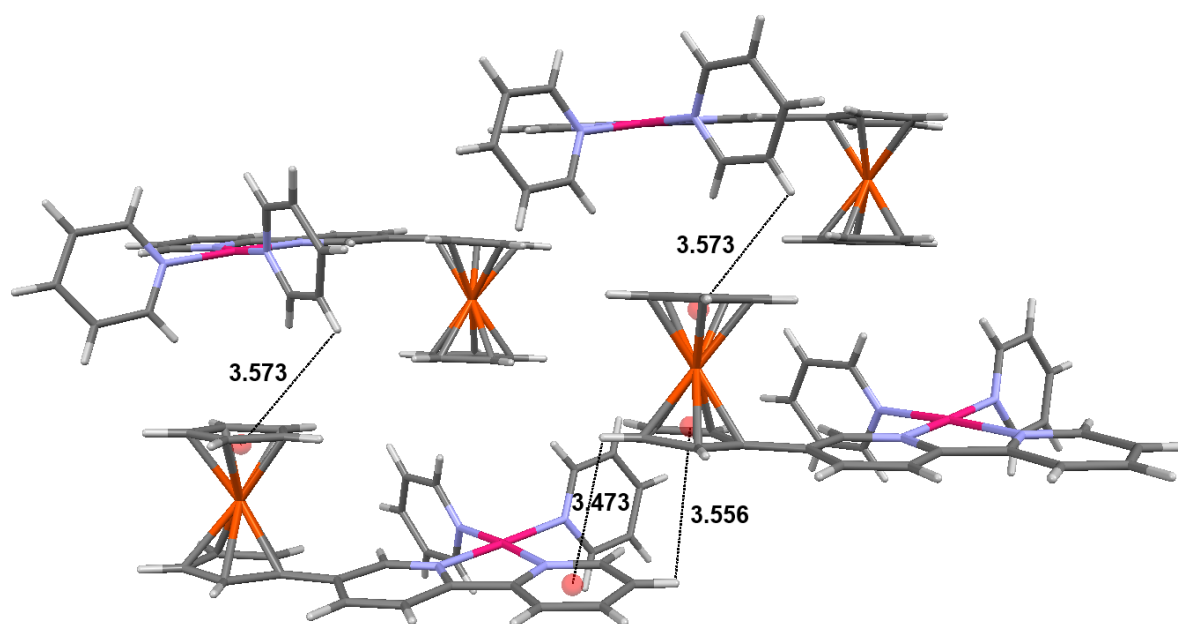

**Figure S50**  $\pi$ -stacking interactions within the extended solid state structure of **5a**, with H-centroid distances shown in Å. Solvent and counterions are omitted for clarity.

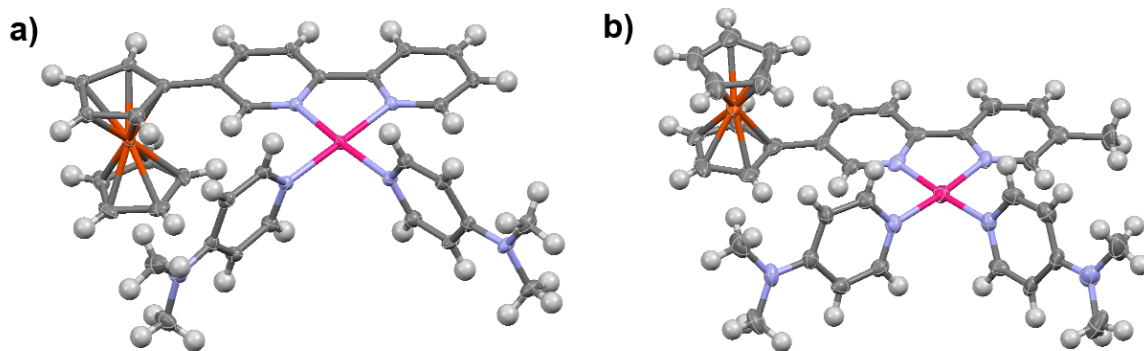

**Figure S51** Mercury ellipsoid plots of a) **6a** and b) **6b**. Solvent and counterions are omitted for clarity. Ellipsoids are shown at the 50% probability level.

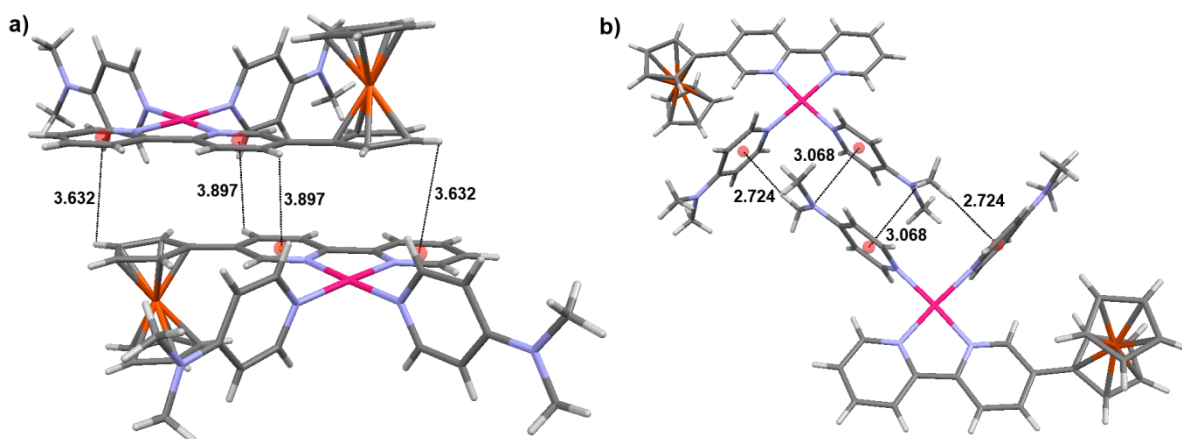

**Figure S52**  $\pi$ -stacking interactions of a) the FcBipy ligand  $\pi$ -surfaces, and b) the interdigitating DMAP ligands within the extended solid state structure of **6a**, with H-centroid distances shown in Å. Solvent and counterions are omitted for clarity.

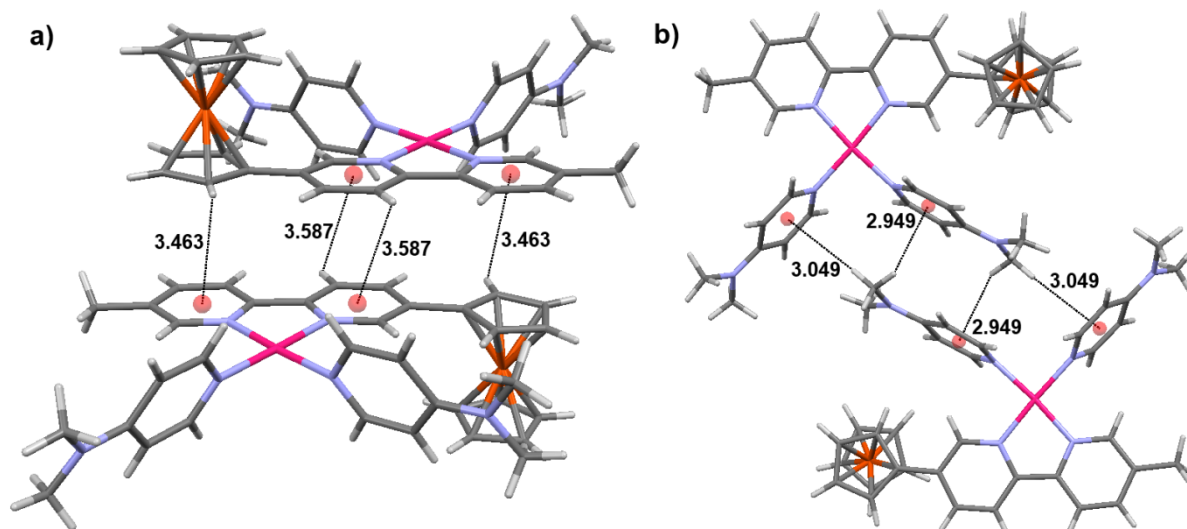

**Figure S53**  $\pi$ -stacking interactions of a) the FcBipy ligand  $\pi$ -surfaces, and b) the interdigitating DMAP ligands within the extended solid state structure of **6b**, with H-centroid distances shown in Å. Solvent and counterions are omitted for clarity.

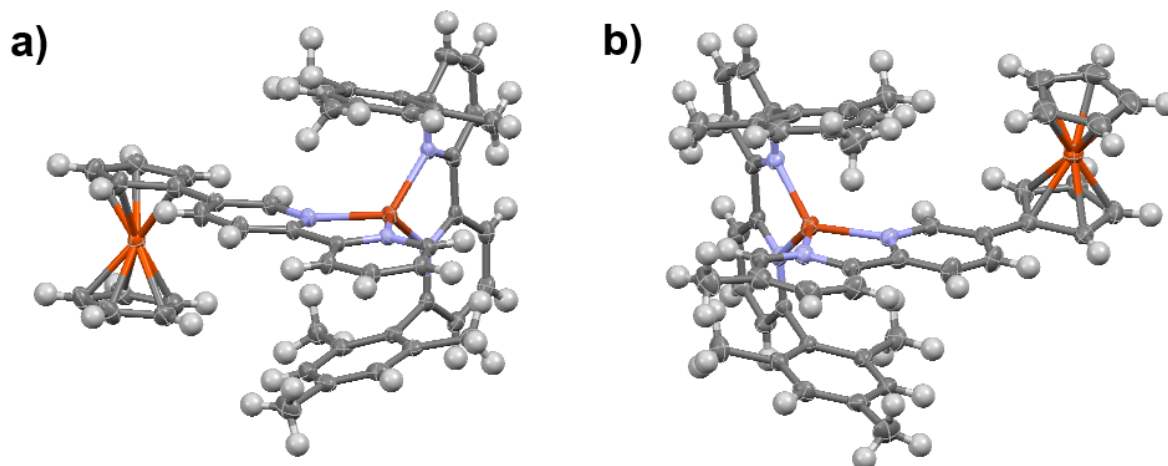

**Figure S54** Mercury ellipsoid plots of a) **11a** and b) **11b**. Solvent and counterions omitted for clarity. Ellipsoids are shown at the 50% probability level. **11b** was subject to Platon Squeeze, details of which follow.

#### PLATON SQUEEZE details for **11b**

| Void number    | 1     | 2     | 3     | 4     | 5     | 6     | 7     | 8     |
|----------------|-------|-------|-------|-------|-------|-------|-------|-------|
| Average x      | 0.000 | 0.000 | 0.250 | 0.250 | 0.500 | 0.500 | 0.750 | 0.750 |
| Average y      | 0.250 | 0.750 | 0.000 | 0.500 | 0.250 | 0.750 | 0.000 | 0.500 |
| Average z      | 0.625 | 0.375 | 0.800 | 0.191 | 0.875 | 0.125 | 0.690 | 0.303 |
| Volume         | 36.8  | 36.8  | 771.4 | 771.4 | 36.7  | 36.7  | 771.3 | 771.4 |
| Electron count | -3.8  | -4.0  | 220.3 | 220.1 | -4.0  | -3.8  | 220.1 | 220.3 |

The packing of the crystal shows sizeable solvent channels containing significant amounts of diffuse electron density, accounted for by disordered solvent which could not be modelled as discrete molecules. As such, PLATON SQUEEZE was employed to calculate the contribution to the diffraction from the solvent channels and thereby produced a set of solvent-free diffraction intensities.

#### Details

SQUEEZE estimated four 'voids' containing 220 electrons each. This gives a total of 880 electrons. Due to this being a tetragonal space group with 16 asymmetric units per unit cell, this amounts to  $880/16 = 55$  electrons per asymmetric unit. This can be accounted for by 5.5 water molecules per asymmetric unit.

## 7 References

1. S.-H. Kim and R. D. Rieke, *Tetrahedron*, 2010, **66**, 3135-3146.
2. M. Schmittel, A. Ganz, W. A. Schenk and M. Hagel, *Z. Naturforsch., B Chem. Sci.*, 1999, **54**, 559-564.
3. J. R. Wright, K. J. Shaffer, C. J. McAdam and J. D. Crowley, *Polyhedron*, 2012, **36**, 73-78.
4. I. Noviadri, K. N. Brown, D. S. Fleming, P. T. Gulyas, P. A. Lay, A. F. Masters and L. Phillips, *J. Phys. Chem. B*, 1999, **103**, 6713-6722.
5. F. Barrière and W. E. Geiger, *J. Am. Chem. Soc.*, 2006, **128**, 3980-3989.
6. M. G. Fraser, H. van der Salm, S. A. Cameron, A. G. Blackman and K. C. Gordon, *Inorg. Chem.*, 2013, **52**, 2980-2992.
7. G. M. Sheldrick, *SADABS: Program for Absorption Correction*, University of Goettingen, Goettingen, Germany, 1996.

8. A. Altomare, M. C. Burla, M. Camalli, G. L. Cascarano, C. Giacovazzo, A. Guagliardi, A. G. G. Moliterni, G. Polidori and R. Spagna, *J. Appl. Crystallogr.*, 1999, **32**, 115-119.
9. L. J. Barbour, *Journal of Supramolecular Chemistry*, 2001, **1**, 189-191.
10. G. M. Sheldrick, *Acta Crystallogr., Sect. A: Found. Crystallogr.*, 2008, **64**, 112-122.
